# Supplementary material for: Deciphering the effect of an oxovanadium(iv) complex with the flavonoid chrysin (VOChrys) on intracellular cell signalling pathways in an osteosarcoma cell line
Source: Royal Society of Chemistry journal article supplement (doi:10.1039/c6mt00045b), 2016-01-01
Supplement: c6mt00045b3.xlsx [file c6mt00045b3.xlsx]

## Sheet: Hoja1
		Up
Name	Subcellular location	RATIO (Cy5/Cy3NORMALIZED)
Bcl-x	Mitochondrion/Nucleus membrane/Cytoplasm	2.18
Bcl-10	Cytoplasm/membrane raft	2.12
Caspase 7	Cytoplasm	2
Caspase 10	Cytoplasm/Cytosol/Ripoptosome/CD95 death-inducing signaling complex	2.06
GADD 153 (CHOP-10)	Cytoplasm/Nucleus	2.24
Phosphatidylserine Receptor (PSR)	Nucleus	2.04
c-myc	Nucleus	2.11
E2F1	Nucleus	2.07
p21Waf-1	Cytoplasm/Nucleus	2.25
HDAC 4 (Histone Deacetylase 4)	Cytoplasm/Nucleus	2.05
PCAF	Nucleus	2.05
Phospho-Histone H3 (pS28)	Nucleus/Chromosome	2.14
Myosin Va (LE-16)	Cytoplasm/Nucleus/extracellular exosome/Golgi apparatous	2.38
Nerve Growth Factor Receptor	Membrane	2.32
Phospho-Ta (pS199/202)	Cytoplasm/Cell membrane/Cell projection	5.05
FAK Phospho (pY577)	Cytoplasm/Nucleus/Cell membrane/Cell junction	4.11
Phospholipase A2 group V	Secreted	2.08
PKC b	Cytoplasm/Nucleus/Membrane	2.35
PKC g	Cytoplasm/Cell junction/Cell membrane/Cell projection	2.83
PTEN	Cytoplasm/Nucleus	2.21
Pyk2	Cytoplasm/Cell junction/Cell membrane/Cell projection/Nucleus	2.09
		Down
Name	Subcellular location	RATIO (Cy5/Cy3NORMALIZED)
GRB-2	Nucleus/Cytoplasm/Golgi apparatus/Endosome	0.39
Cofilin	Cytoplasm/Cell projection/Nucleus matrix	0.45
