# Supplementary material for: Deciphering the effect of an oxovanadium(iv) complex with the flavonoid chrysin (VOChrys) on intracellular cell signalling pathways in an osteosarcoma cell line
Source: Royal Society of Chemistry journal article supplement (doi:10.1039/c6mt00045b), 2016-01-01
Supplement: c6mt00045b4.xlsx [file c6mt00045b4.xlsx]

## Sheet: Hoja1
		Up
Name	Subcellular location	RATIO (Cy5/Cy3NORMALIZED)
Bcl-x	Mitochondrion/Nucleus membrane/Cytoplasm	2.15
Bcl-xL	Mitochondrion/Nucleus membrane/Cytoplasm	2.27
Bcl-10	Cytoplasm/membrane raft	2.53
Caspase 6	Cytoplasm/Nucleoplasm	2.83
Caspase 7	Cytoplasm	3.08
Caspase 10	Cytoplasm/Cytosol/Ripoptosome/CD95 death-inducing signaling complex	2.19
Caspase 11	Nucleus	2.6
GADD 153 (CHOP-10)	Cytoplasm/Nucleus	2.95
Phosphatidylserine Receptor (PSR)	Nucleus	3.04
c-myc	Nucleus	2.53
Ap-1/cjun	Nucleus	3.13
ATF2	Cytoplasm/Nucleus/Mitochondrion	2.96
HDAC 4 (Histone Deacetylase 4)	Cytoplasm/Nucleus	2.25
PCAF	Nucleus	2.93
a Catenin	Cytoplasm › cytoskeleton/Cell junction › adherens junction/Cell membrane; Peripheral membrane protein; Cytoplasmic side	2.16
Myosin Va (LE-16)	Cytoplasm/Nucleus/extracellular exosome/Golgi apparatous	2.1
Glutamate receptor NMDAR 2a	Cell membrane/ Cell junction	2.19
Nerve Growth Factor Receptor	Membrane	2.55
Neurofilament 200	Cytoplasm/ Mitochondrion/Nucleus/axon/neurofilament/perikaryon	2.01
Tyrosine Hydroxylase	Cytoplasm/Mitochondrion/Perikaryon/Mitochondrion	2.97
FAK Phospho (pY577)	Cytoplasm/Nucleus/Cell membrane/Cell junction	2.77
JNK	Cytoplasm/Nucleus	2.54
MAP Kinase (ERK1+ERK2)	Cytoplasm/Nucleus	2.78
PKC a	Cytoplasm/Nucleus/Cell membrane/Mitochondrion membrane	2.97
PKC b	Cytoplasm/Nucleus/Membrane	3.23
PKC g	Cytoplasm/Cell junction/Cell membrane/Cell projection	3.59
Pyk2	Cytoplasm/Cell junction/Cell membrane/Cell projection/Nucleus	2.32
AP2 beta	Nuclear	2.35
		Down
Name	Subcellular location	RATIO (Cy5/Cy3NORMALIZED)
Caspase 9	Mitochondrion/Nucleus membrane/Cytoplasm/Apoptosome	0.47
Cathepsin D	Lysosome/Melanosome/Secreted	0.45
Chk2	Nucleus	0.5
Cyclin D1	Nucleus/Cytoplasm/Membrane	0.46
Phospho-Histone H3 (pS10) Clone:H3-P	Nucleus/Chromosome	0.5
Dystrophin	Cell membrane/Cytoplasm/Cell junction	0.43
S-100 b	Cytoplasm	0.28
Phospho-Pyk2 (pY579/580)	Cytoplasm/Cell junction/Cell membrane/Cell projection/Nucleus	0.46
