# Supplementary material for: Deciphering the effect of an oxovanadium(iv) complex with the flavonoid chrysin (VOChrys) on intracellular cell signalling pathways in an osteosarcoma cell line
Source: Royal Society of Chemistry journal article supplement (doi:10.1039/c6mt00045b), 2016-01-01
Supplement: c6mt00045b5.xlsx [file c6mt00045b5.xlsx]

## Sheet: Hoja1
		Up
Name	Subcellular location	RATIO (Cy5/Cy3NORMALIZED)
Bcl-x	Mitochondria/Nucleus membrane/Cytoplasm	2.36
Caspase 4	Mitochondria/Endoplasmic reticulum membrane	2.75
Caspase 5	Cytoplasm/NLPR1 inflammosome complex	2.15
Caspase 6	Cytoplasm/Nucleoplasm	3.51
Caspase 7	Cytoplasm	3.97
Caspase 10	Cytoplasm/Cytosol/Ripoptosome/CD95 death-inducing signaling complex	2.3
Caspase 11	Nucleus	3.97
Cystatin A	Cytoplasm	3.61
DAP-Kinase	Cytoplasm/Cytoskeleton	3.34
Phospho-DAPK (pS308)	Cytoplasm/Cytoskeleton	4.64
GADD 153 (CHOP-10)	Cytoplasm/Nucleus	2.88
Phosphatidylserine Receptor (PSR)	Nucleus	2.53
c-Abl	Mitochondrion/Nucleus/Cytoplasm	3.27
Cdc25	Nucleus	2.6
Cdk4	Cytoplasm/Nucleus/centrosome	3.18
Cdk6	Cytoplasm/Nucleus/centrosome	7.84
Cdk-7/cak	Cytoplasm/Nucleus	3.32
c-myc	Nucleus	3.62
Cyclin A 4210	Cytoplasm/Nucleus	7.56
Cyclin D3	Cytoplasm/Nucleus/membrane	3.21
p14 arf	Cytoplasm/Nucleus	2.64
PML	Cytoplasm/Nucleus/Endoplasmid reticulum membrane/Early endosome membrane	4.69
p21Waf-1	Cytoplasm/Nucleus	2.6
p34cdc2	Cytoplasm/Nucleus/Centrosome/Spindle	2.5
Phospho-Retinoblastoma (pS795)	Nucleus	2.18
SMAD4	Cytoplasm/Nucleus	8.7
Ap-1/cjun	Nucleus	7.53
ATF2	Cytoplasm/Nucleus/Mitochondrion	2.26
HAT1 ( Histone acetyltransferase)	Nucleus	2.22
HDAC 4 (Histone Deacetylase 4)	Cytoplasm/Nucleus	2.84
SUV39H1 Histone Methyl Transferase	Nucleus/Chromosome	2
PCAF	Nucleus	3.92
Phospho-Histone H3 (pS28)	Nucleus/Chromosome	4.17
NTF2	Cytoplasm	4.15
Topoisomerase-1	Nucleus	5.57
Trf-1	Cytoplasm/Nucleus/Chromosome	7.98
Aop-1	Mitochondrion	6.67
HSP 70	Cytoplasm	2.84
HSP 90	Cytoplasm	8.76
Calmodulin	Cytoplasm	3.75
Adaptin b1+b2	Golgi apparatus/Cytoplasmic vesicle	7.09
a Catenin	Cytoplasm › cytoskeleton/Cell junction › adherens junction/Cell membrane; Peripheral membrane protein; Cytoplasmic side	4.03
Connexin 43	Cell membrane /Endoplasmic reticulum	3.2
Cytokeratin 8.12	extracellular exosome/nucleus/intermediate filament cytoskeleton/keratin filament	7.16
Cytokeratin pep 8.60	Cytoplasm/Nucleus/membrane/extracellular exosome/intermediate filament cytoskeleton/keratin filament	3.32
Cytokeratin pep 19	cell peripherySource: MGI/costamere/dystrophin-associated glycoprotein complex/extracellular exosome/plasma membrane/sarcolemma	2.66
Cytokeratin pep 4	Cell surface/Nucleus	5.39
Cytokeratin pep 7	Cytoplasm/Nucleus/extracellular exosome	3.36
Cytokeratin pep 8.13	Nucleus/extracellular exosome	8.43
Cytokeratin pep 13	Nucleus/extracellular exosome	3.89
Cytokeratin pep 18	Cytoplasm/Nucleus	3.65
Ezrin	Cytoplasm/Apical cell membrane/Cell projection	2.41
Internexin a	Cytoplasm/Nucleus	3.38
Myosin Va (LE-16)	Cytoplasm/Nucleus/extracellular exosome/Golgi apparatous	2.68
Pan Cadherin	Endosome/Golgi apparatous/Cell junction/Cell membrane	3.89
Vinculin	Cytoplasm/Cell membrane/Cell junction	9.88
Chondroitin Sulfate	Secreted>Extracelullar space>Extracelullar matrix	4.77
i-NOS	Cytoplasm/Nucleus/peroxisome/intracellular/cortical cytoskeleton	3.17
b-NOS	Cell membrane /Cell projection	4.44
e-NOS	Cytoplasm/Cell membrane/Golgi apparatus	3.54
Neurofilament 200	Cytoplasm/ Mitochondrion/Nucleus/axon/neurofilament/perikaryon	6.1
b-Synuclein (PNP-14)	Cytoplasm/Golgi apparatus/Mitochondrion/Nucleoplasm/	6.15
Tyrosine Hydroxylase	Cytoplasm/Mitochondrion/Perikaryon/Mitochondrion	10.47
Phospho-Ta (pS199/202)	Cytoplasm/Cell membrane/Cell projection	2.23
ARNO (Cytohesin 2)	Cytoplasm/Cell membrane/Cell projection	2.11
GRP1(ARNO3 Cytohesin-3)	Cytoplasm/Cell membrane	3.46
FADD	Cytosol/Cell body/Ripoptosome/Membrane raft	2.32
FAK Phospho (pY577)	Cytoplasm/Nucleus/Cell membrane/Cell junction	2.56
NAK	Cytoplasm	6.2
NF-kB	Cytoplasm/Nucleus	3.53
JNK	Cytoplasm/Nucleus	4.91
MAP Kinase (ERK1+ERK2)	Cytoplasm/Nucleus	4.62
Cdc7 Kinase	Nucleus	4.03
Phospho-PAK (pS212)	Cytoplasm/Cell junction/Cell membrane/Cell projection	2.03
Phospholipase A2 group V	Secreted	4.18
PKB /AKT	Cytoplasm/Nucleus/Cell membrane	2.23
PKC a	Cytoplasm/Nucleus/Cell membrane/Mitochondrion membrane	2.86
PKC b	Cytoplasm/Nucleus/Membrane	2.57
PKC g	Cytoplasm/Cell junction/Cell membrane/Cell projection	2.43
Pyk2	Cytoplasm/Cell junction/Cell membrane/Cell projection/Nucleus	4.04
AP2 beta	Nuclear	8.82
AP2 alpha	Nuclear	2.54
AP2 gamma	Nuclear	3.35
		Down
Name	Subcellular location	RATIO (Cy5/Cy3NORMALIZED)
CDC6	Cytoplasm/Nucleus	0.39
Cyclin D1	Cytoplasm/Nucleus/Membrane	0.3
MDM2	Cytoplasm/Nucleus	0.47
Phospho-Histone H3	Nucleus/Chromosome	0.35
Clathrin Light Chain	Cytoplasmic vesicle membrane/ Membrane/ Cytoplasmic side	0.44
Dystrophin	Cell membrane/Cytoplasm/Cell junction	0.49
FAK phospho (pY397)	Cytoplasm/Nucleus/Cell membrane/Cell junction	0.44
GRB-2	Nucleus/Cytoplasm/Golgi apparatus/Endosome	0.45
RAF1	Cell membrane/Cytoplasm/Mitochondrion/Nucleus	0.49
