# Supplementary material for: Deciphering the effect of an oxovanadium(iv) complex with the flavonoid chrysin (VOChrys) on intracellular cell signalling pathways in an osteosarcoma cell line
Source: Royal Society of Chemistry journal article supplement (doi:10.1039/c6mt00045b), 2016-01-01
Supplement: c6mt00045b7.xlsx [file c6mt00045b7.xlsx]

## Sheet: t2t_1A64B2CECEE91436807659275
Annotation Database Categories	Biological Term enriched	N proteins in term	%	N proteins in Total	Population Hits	Population Total	p.value	adj.p.value (Benjamini)	Proteins IDs	Fold Enrichment
GOTERM_BP_FAT	GO:0033554~cellular response to stress	4	3669724770642200	8	566	13528	0.002247422090418152	0.520846410155816	CCND1, CASP9, CTSD, CHEK2	1.19505e+16
KEGG_PATHWAY	hsa04115:p53 signaling pathway	3	2.75229e+16	7	68	5085	0.0025532715199641097	0.08559233472200656	CCND1, CASP9, CHEK2	3204831932773100
GOTERM_BP_FAT	GO:0006974~response to DNA damage stimulus	3	2.75229e+16	8	373	13528	0.014525999728058712	0.6159443402172278	CCND1, CASP9, CHEK2	1.36005e+16
GOTERM_BP_FAT	GO:0009628~response to abiotic stimulus	3	2.75229e+16	8	368	13528	0.014156245164410507	0.6882465096138017	CCND1, CASP9, PTK2B	1.37853e+16
GOTERM_BP_FAT	GO:0043085~positive regulation of catalytic activity	3	2.75229e+16	8	520	13528	0.027237248382501942	0.7247340965155875	CCND1, CASP9, PTK2B	975576923076923
GOTERM_BP_FAT	GO:0044093~positive regulation of molecular function	3	2.75229e+16	8	586	13528	0.034032138057721414	0.757143660654248	CCND1, CASP9, PTK2B	8656996587030710
GOTERM_BP_FAT	GO:0031175~neuron projection development	3	2.75229e+16	8	256	13528	0.007035457378880538	0.6847416428569271	S100B, PTK2B, DMD	1981640625
GOTERM_BP_FAT	GO:0048666~neuron development	3	2.75229e+16	8	339	13528	0.012097091446576343	0.7346281918238478	S100B, PTK2B, DMD	1.49646e+16
GOTERM_BP_FAT	GO:0030030~cell projection organization	3	2.75229e+16	8	368	13528	0.014156245164410507	0.6882465096138017	S100B, PTK2B, DMD	1.37853e+16
GOTERM_BP_FAT	GO:0030182~neuron differentiation	3	2.75229e+16	8	438	13528	0.01971628178070701	0.6621899842922954	S100B, PTK2B, DMD	1.15822e+16
SP_PIR_KEYWORDS	cytoplasm	3	2.75229e+16	8	3332	19235	0.34865332781214275	0.9994482866715745	S100B, PTK2B, DMD	2164803421368540
GOTERM_MF_FAT	GO:0004672~protein kinase activity	3	2.75229e+16	8	606	12983	0.03907124587295247	0.6380693842093927	CCND1, PTK2B, CHEK2	8034034653465340
GOTERM_BP_FAT	GO:0006468~protein amino acid phosphorylation	3	2.75229e+16	8	667	13528	0.0432153624649697	0.7991297140466702	CCND1, PTK2B, CHEK2	7.6057e+16
GOTERM_BP_FAT	GO:0016310~phosphorylation	3	2.75229e+16	8	800	13528	0.060144464022979564	0.8155345310123054	CCND1, PTK2B, CHEK2	6.34125e+16
GOTERM_BP_FAT	GO:0006793~phosphorus metabolic process	3	2.75229e+16	8	973	13528	0.08520069514212275	0.8935377169876493	CCND1, PTK2B, CHEK2	521377183967112
GOTERM_BP_FAT	GO:0006796~phosphate metabolic process	3	2.75229e+16	8	973	13528	0.08520069514212275	0.8935377169876493	CCND1, PTK2B, CHEK2	521377183967112
GOTERM_BP_FAT	GO:0007242~intracellular signaling cascade	3	2.75229e+16	8	1256	13528	0.1322044822478199	0.9635576415452667	CCND1, PTK2B, CHEK2	4039012738853500
UP_SEQ_FEATURE	mutagenesis site	3	2.75229e+16	8	2045	19113	0.16727670348011955	0.9999830158863623	CCND1, PTK2B, CHEK2	3.50483e+16
GOTERM_BP_FAT	GO:0008219~cell death	3	2.75229e+16	8	719	13528	0.049571873076432134	0.8103466727231607	CASP9, PTK2B, CTSD	7.05563e+16
GOTERM_BP_FAT	GO:0016265~death	3	2.75229e+16	8	724	13528	0.050201265591412386	0.7837042066637392	CASP9, PTK2B, CTSD	7.00691e+16
SP_PIR_KEYWORDS	phosphoprotein	6	5.50459e+16	8	7263	19235	0.07612809563848047	0.9960841756179792	CCND1, CASP9, PTK2B, DMD, H3F3A, CHEK2	1.98627e+16
SP_PIR_KEYWORDS	disease mutation	3	2.75229e+16	8	1591	19235	0.10863159047504413	0.9821349866337328	DMD, CTSD, CHEK2	4533705216844750
SP_PIR_KEYWORDS	alternative splicing	4	3669724770642200	8	7488	19235	0.5565987743476641	0.9999242649282208	CASP9, PTK2B, DMD, CHEK2	1.28439e+16
UP_SEQ_FEATURE	splice variant	4	3669724770642200	8	7458	19113	0.5586237915953709	0.9999999999779063	CASP9, PTK2B, DMD, CHEK2	1.28138e+16
SP_PIR_KEYWORDS	polymorphism	5	4587155963302750	8	11550	19235	0.7111433175319737	0.999995955878541	CASP9, PTK2B, DMD, CTSD, CHEK2	1.04085e+16
UP_SEQ_FEATURE	sequence variant	5	4587155963302750	8	11992	19113	0.7613710854994077	0.9999999999996415	CASP9, PTK2B, DMD, CTSD, CHEK2	0.9961328385590393
SP_PIR_KEYWORDS	metal-binding	3	2.75229e+16	8	2972	19235	0.29603777098369743	0.999722783964817	S100B, DMD, CHEK2	2.42703e+16
GOTERM_MF_FAT	GO:0046872~metal ion binding	3	2.75229e+16	8	4140	12983	0.7091793875659116	0.9999999992385732	S100B, DMD, CHEK2	1.176e+16
GOTERM_MF_FAT	GO:0043169~cation binding	3	2.75229e+16	8	4179	12983	0.7150403462692481	0.999999888188101	S100B, DMD, CHEK2	1.16502e+16
GOTERM_MF_FAT	GO:0043167~ion binding	3	2.75229e+16	8	4241	12983	0.7242040209704613	0.9999980321278166	S100B, DMD, CHEK2	1.14799e+16
