# Supplementary material for: Deciphering the effect of an oxovanadium(iv) complex with the flavonoid chrysin (VOChrys) on intracellular cell signalling pathways in an osteosarcoma cell line
Source: Royal Society of Chemistry journal article supplement (doi:10.1039/c6mt00045b), 2016-01-01
Supplement: c6mt00045b8.xlsx [file c6mt00045b8.xlsx]

## Sheet: t2t_1A64B2CECEE91436807490373
Annotation Database Categories	Biological Term enriched	N proteins in term	%	N proteins in Total	Population Hits	Population Total	p.value	adj.p.value (Benjamini)	Proteins IDs	Fold Enrichment
GOTERM_BP_FAT	GO:0043065~positive regulation of apoptosis	12	4395604395604390	25	430	13528	506993	4.38041e+08	PRKCA, BCL10, CASP10, CASP6, MAPK1, JUN, GRIN2A, MAPK8, BCL2L1, NGFR, MYC, DDIT3	1.5101e+16
GOTERM_BP_FAT	GO:0043068~positive regulation of programmed cell death	12	4395604395604390	25	433	13528	54629.5	2.35999e+07	PRKCA, BCL10, CASP10, CASP6, MAPK1, JUN, GRIN2A, MAPK8, BCL2L1, NGFR, MYC, DDIT3	1.49964e+16
GOTERM_BP_FAT	GO:0010942~positive regulation of cell death	12	4395604395604390	25	435	13528	57400.2	1.65313e+08	PRKCA, BCL10, CASP10, CASP6, MAPK1, JUN, GRIN2A, MAPK8, BCL2L1, NGFR, MYC, DDIT3	1492744827586200
GOTERM_BP_FAT	GO:0009628~response to abiotic stimulus	10	3.663e+16	25	368	13528	674425	9.71171e+08	PRKCA, CASP6, PTK2B, JUN, CASP7, GRIN2A, MAPK8, BCL2L1, NGFR, MYC	1.47043e+16
GOTERM_BP_FAT	GO:0010033~response to organic substance	12	4395604395604390	25	721	13528	1.20604e+08	1.4886e+10	PRKCA, BCL10, CASP6, MAPK1, KAT2B, PTK2B, JUN, TH, GRIN2A, BCL2L1, MYC, DDIT3	900615811373093
GOTERM_BP_FAT	GO:0042981~regulation of apoptosis	12	4395604395604390	25	804	13528	3.73258e+07	3.22495e+10	PRKCA, BCL10, CASP10, CASP6, MAPK1, JUN, GRIN2A, MAPK8, BCL2L1, NGFR, MYC, DDIT3	8076417910447760
GOTERM_BP_FAT	GO:0043067~regulation of programmed cell death	12	4395604395604390	25	812	13528	4.13411e+06	3.24715e+09	PRKCA, BCL10, CASP10, CASP6, MAPK1, JUN, GRIN2A, MAPK8, BCL2L1, NGFR, MYC, DDIT3	7996847290640390
GOTERM_BP_FAT	GO:0010941~regulation of cell death	12	4395604395604390	25	815	13528	4.29438e+07	3.09195e+09	PRKCA, BCL10, CASP10, CASP6, MAPK1, JUN, GRIN2A, MAPK8, BCL2L1, NGFR, MYC, DDIT3	7967411042944780
GOTERM_BP_FAT	GO:0006917~induction of apoptosis	8	293040293040293	25	320	13528	9.50269e+08	5.4734e+10	PRKCA, BCL10, CASP10, CASP6, MAPK1, MAPK8, NGFR, MYC	13528
GOTERM_BP_FAT	GO:0012502~induction of programmed cell death	8	293040293040293	25	321	13528	9.70368e+08	5.23986e+11	PRKCA, BCL10, CASP10, CASP6, MAPK1, MAPK8, NGFR, MYC	1.34859e+16
GOTERM_BP_FAT	GO:0008624~induction of apoptosis by extracellular signals	4	1465201465201460	25	112	13528	9.85011e+11	0.02006895699971445	PRKCA, CASP10, MAPK8, NGFR	1.93257e+16
GOTERM_BP_FAT	GO:0008219~cell death	13	4761904761904760	25	719	13528	695743	1.50281e+08	BCL10, PRKCG, BCL2L1, CASP10, CASP6, PTK2B, JMJD6, CASP7, JUN, NEFH, MAPK8, NGFR, MYC	9783810848400550
GOTERM_BP_FAT	GO:0016265~death	13	4761904761904760	25	724	13528	753319	1.30174e+08	BCL10, PRKCG, BCL2L1, CASP10, CASP6, PTK2B, JMJD6, CASP7, JUN, NEFH, MAPK8, NGFR, MYC	9716243093922650
GOTERM_BP_FAT	GO:0006915~apoptosis	11	4029304029304020	25	602	13528	3.15085e+07	3.40292e+09	BCL10, CASP10, CASP6, JMJD6, PTK2B, JUN, CASP7, MAPK8, BCL2L1, NGFR, MYC	9887574750830560
GOTERM_BP_FAT	GO:0012501~programmed cell death	11	4029304029304020	25	611	13528	3.62695e+07	3.48187e+09	BCL10, CASP10, CASP6, JMJD6, PTK2B, JUN, CASP7, MAPK8, BCL2L1, NGFR, MYC	9741931260229130
UP_SEQ_FEATURE	mutagenesis site	10	3.663e+16	25	2045	19113	5.27639e+11	0.009847040992547962	BCL10, CASP10, CASP6, PTK2, KAT2B, JMJD6, PTK2B, CASP7, MAPK8, BCL2L1	3.73848e+16
GOTERM_BP_FAT	GO:0001836~release of cytochrome c from mitochondria	4	1465201465201460	25	21	13528	6.39001e+08	2.76011e+11	JUN, CASP7, BCL2L1, MYC	1030704761904760
GOTERM_BP_FAT	GO:0008637~apoptotic mitochondrial changes	4	1465201465201460	25	31	13528	2.13463e+10	8.01564e+11	JUN, CASP7, BCL2L1, MYC	6982193548387090
GOTERM_BP_FAT	GO:0009314~response to radiation	6	2197802197802190	25	200	13528	2.27174e+11	8.17502e+11	CASP6, CASP7, GRIN2A, MAPK8, BCL2L1, MYC	162336
GOTERM_BP_FAT	GO:0007005~mitochondrion organization	4	1465201465201460	25	138	13528	0.0017968937877531138	0.030009379996841168	JUN, CASP7, BCL2L1, MYC	1568463768115940
GOTERM_BP_FAT	GO:0010605~negative regulation of macromolecule metabolic process	6	2197802197802190	25	734	13528	0.008329070051468266	0.09303804366086099	PRKCA, JUN, GRIN2A, PRKCG, BCL2L1, MYC	4.42332e+16
GOTERM_BP_FAT	GO:0009314~response to radiation	6	2197802197802190	25	200	13528	2.27174e+11	8.17502e+11	CASP6, CASP7, GRIN2A, MAPK8, BCL2L1, MYC	162336
BIOCARTA	h_chemicalPathway:Apoptotic Signaling in Response to DNA Damage	5	1.8315e+16	16	22	1437	5.04964e+10	0.002748338865766642	PRKCA, CASP6, PTK2, CASP7, BCL2L1	2.04119e+16
SP_PIR_KEYWORDS	Apoptosis	6	2197802197802190	25	381	19235	9.25457e+09	0.0029572168263668486	BCL10, CASP10, CASP6, CASP7, BCL2L1, NGFR	1.21165e+16
KEGG_PATHWAY	hsa04210:Apoptosis	4	1465201465201460	22	87	5085	0.005149173639731656	0.01903243589535286	CASP10, CASP6, CASP7, BCL2L1	1.0627e+16
BIOCARTA	h_mitochondriaPathway:Role of Mitochondria in Apoptotic Signaling	3	1098901098901090	16	22	1437	0.020831900049432445	0.10351132767811366	CASP6, CASP7, BCL2L1	1224715909090900
BBID	72.IAP_interaction_with_cell_death_pathways	3	1098901098901090	9	15	358	0.039699128477551554	0.7477396567780255	CASP6, CASP7, BCL2L1	7955555555555550
GOTERM_BP_FAT	GO:0010033~response to organic substance	12	4395604395604390	25	721	13528	1.20604e+08	1.4886e+10	PRKCA, BCL10, CASP6, MAPK1, KAT2B, PTK2B, JUN, TH, GRIN2A, BCL2L1, MYC, DDIT3	900615811373093
GOTERM_BP_FAT	GO:0000302~response to reactive oxygen species	6	2197802197802190	25	75	13528	1.79117e+08	1.19044e+11	PRKCA, CASP6, PTK2B, JUN, BCL2L1, DDIT3	4328959999999990
GOTERM_BP_FAT	GO:0009719~response to endogenous stimulus	9	3296703296703290	25	405	13528	2.90824e+08	1.79478e+10	PRKCA, CASP6, MAPK1, KAT2B, PTK2B, TH, GRIN2A, BCL2L1, DDIT3	1.20249e+16
GOTERM_BP_FAT	GO:0010035~response to inorganic substance	7	2564102564102560	25	205	13528	1.20644e+09	6.13138e+10	PRKCA, CASP6, PTK2B, JUN, MAPK8, BCL2L1, DDIT3	1847726829268290
GOTERM_BP_FAT	GO:0042542~response to hydrogen peroxide	5	1.8315e+16	25	56	13528	2.63091e+09	1.26276e+11	CASP6, PTK2B, JUN, BCL2L1, DDIT3	4831428571428570
GOTERM_BP_FAT	GO:0010243~response to organic nitrogen	5	1.8315e+16	25	63	13528	4.23154e+09	1.92406e+11	CASP6, PTK2B, GRIN2A, BCL2L1, DDIT3	4294603174603170
GOTERM_BP_FAT	GO:0006979~response to oxidative stress	6	2197802197802190	25	164	13528	8.68941e+09	3.57445e+11	PRKCA, CASP6, PTK2B, JUN, BCL2L1, DDIT3	1.97971e+16
GOTERM_BP_FAT	GO:0019725~cellular homeostasis	8	293040293040293	25	466	13528	1.14404e+11	4.49199e+12	PRKCA, PTK2B, JUN, GRIN2A, BCL2L1, MYC, DDIT3, PRKCB	9289613733905570
GOTERM_BP_FAT	GO:0042592~homeostatic process	9	3296703296703290	25	751	13528	2.88449e+11	9.96396e+11	PRKCA, JMJD6, PTK2B, JUN, GRIN2A, BCL2L1, MYC, DDIT3, PRKCB	648479360852197
KEGG_PATHWAY	hsa04912:GnRH signaling pathway	6	2197802197802190	22	98	5085	3.82354e+10	6.4025e+11	PRKCA, MAPK1, PTK2B, JUN, MAPK8, PRKCB	1415120593692020
BIOCARTA	h_pyk2Pathway:Links between Pyk2 and Map Kinases	5	1.8315e+16	16	26	1437	1.00674e+12	0.003651341512982742	PRKCA, MAPK1, PTK2B, JUN, MAPK8	1.72716e+16
GOTERM_BP_FAT	GO:0009612~response to mechanical stimulus	4	1465201465201460	25	56	13528	1.27863e+12	0.0033422955165800516	PRKCA, PTK2B, JUN, MYC	3865142857142850
BIOCARTA	h_biopeptidesPathway:Bioactive Peptide Induced Signaling Pathway	5	1.8315e+16	16	30	1437	1.80023e+12	0.004894040382456444	PRKCA, MAPK1, PTK2B, MAPK8, PRKCB	1496875
BIOCARTA	h_Ccr5Pathway:Pertussis toxin-insensitive CCR5 Signaling in Macrophage	4	1465201465201460	16	14	1437	3.13115e+12	0.004864539608355978	PRKCA, PTK2B, JUN, MAPK8	2.56607e+16
GOTERM_BP_FAT	GO:0034097~response to cytokine stimulus	4	1465201465201460	25	79	13528	3.5513e+12	0.00825994643120731	PRKCA, CASP6, JUN, BCL2L1	2739848101265820
GOTERM_BP_FAT	GO:0014070~response to organic cyclic substance	4	1465201465201460	25	121	13528	0.0012316218241716825	0.022881483835870076	PRKCA, PTK2B, JUN, BCL2L1	1.78883e+16
GOTERM_BP_FAT	GO:0032268~regulation of cellular protein metabolic process	6	2197802197802190	25	474	13528	0.0012650106027305684	0.023000739754191923	PRKCA, BCL10, MAPK1, PTK2B, JUN, PRKCG	6849620253164550
BIOCARTA	h_cxcr4Pathway:CXCR4 Signaling Pathway	4	1465201465201460	16	23	1437	0.0014393454368431364	0.01557756181368597	PRKCA, MAPK1, PTK2, PTK2B	1.56196e+16
GOTERM_BP_FAT	GO:0010038~response to metal ion	4	1465201465201460	25	129	13528	0.0014809116552923086	0.026323501134518756	CASP6, PTK2B, MAPK8, BCL2L1	1677891472868210
GOTERM_BP_FAT	GO:0031399~regulation of protein modification process	5	1.8315e+16	25	295	13528	0.0016680934133995347	0.029008409599534657	PRKCA, BCL10, PTK2B, JUN, PRKCG	9171525423728810
KEGG_PATHWAY	hsa04650:Natural killer cell mediated cytotoxicity	5	1.8315e+16	22	133	5085	0.0018942575611226088	0.010530463467831486	PRKCA, MAPK1, PTK2B, PRKCG, PRKCB	8689336978810660
GOTERM_BP_FAT	GO:0007243~protein kinase cascade	5	1.8315e+16	25	370	13528	0.0037920530192173036	0.053239725203220956	PRKCA, BCL10, MAPK1, PTK2B, MAPK8	7312432432432430
GOTERM_BP_FAT	GO:0000165~MAPKKK cascade	4	1465201465201460	25	184	13528	0.004059993518737003	0.055116027187532945	PRKCA, MAPK1, PTK2B, MAPK8	1.17635e+16
GOTERM_BP_FAT	GO:0042493~response to drug	4	1465201465201460	25	216	13528	0.006344079194659543	0.07768078894808972	PTK2B, JUN, GRIN2A, DDIT3	1.00207e+16
GOTERM_BP_FAT	GO:0032270~positive regulation of cellular protein metabolic process	4	1465201465201460	25	233	13528	0.007815540406121979	0.08985823122682002	PRKCA, BCL10, MAPK1, PTK2B	9289613733905570
GOTERM_BP_FAT	GO:0051247~positive regulation of protein metabolic process	4	1465201465201460	25	243	13528	0.00876816414743086	0.09527093825877664	PRKCA, BCL10, MAPK1, PTK2B	8907325102880650
GOTERM_BP_FAT	GO:0043523~regulation of neuron apoptosis	3	1098901098901090	25	90	13528	0.01098477216917782	0.10861619441238679	CASP6, JUN, BCL2L1	1.80373e+16
GOTERM_BP_FAT	GO:0051094~positive regulation of developmental process	4	1465201465201460	25	278	13528	0.012626959628824985	0.12252274598758606	PRKCA, CASP6, JUN, NGFR	7785899280575530
GOTERM_BP_FAT	GO:0040017~positive regulation of locomotion	3	1098901098901090	25	98	13528	0.01292455425212555	0.12386111533055721	PRKCA, MAPK1, PTK2B	1656489795918360
GOTERM_BP_FAT	GO:0007568~aging	3	1098901098901090	25	110	13528	0.016092764286352583	0.14422443412515396	PRKCA, JUN, DDIT3	1475781818181810
GOTERM_BP_FAT	GO:0007242~intracellular signaling cascade	7	2564102564102560	25	1256	13528	0.0197844886636949	0.16943315220721067	PRKCA, BCL10, MAPK1, PTK2B, PRKCG, MAPK8, PRKCB	3.0158e+16
GOTERM_CC_FAT	GO:0045121~membrane raft	3	1098901098901090	22	143	12782	0.022711494501278368	0.20525481040393778	PRKCA, BCL10, PTK2B	1.21888e+16
GOTERM_BP_FAT	GO:0006417~regulation of translation	3	1098901098901090	25	137	13528	0.024292843160103213	0.1949235158876511	PRKCA, MAPK1, PTK2B	1184934306569340
GOTERM_MF_FAT	GO:0019901~protein kinase binding	3	1098901098901090	24	147	12983	0.027574856630149684	0.21219205684079256	BCL10, MAPK1, PTK2B	1.104e+16
GOTERM_BP_FAT	GO:0001932~regulation of protein amino acid phosphorylation	3	1098901098901090	25	173	13528	0.03732936063403529	0.2666219909217682	PRKCA, PTK2B, JUN	9383583815028900
GOTERM_MF_FAT	GO:0019900~kinase binding	3	1098901098901090	24	179	12983	0.03956554146284752	0.25373844880879326	BCL10, MAPK1, PTK2B	9066340782122900
GOTERM_BP_FAT	GO:0040012~regulation of locomotion	3	1098901098901090	25	192	13528	0.045081282237411084	0.3039423242826954	PRKCA, MAPK1, PTK2B	8455
GOTERM_BP_FAT	GO:0042325~regulation of phosphorylation	4	1465201465201460	25	466	13528	0.04808267077477207	0.3139285344145877	PRKCA, BCL10, PTK2B, JUN	4.64481e+16
GOTERM_BP_FAT	GO:0019220~regulation of phosphate metabolic process	4	1465201465201460	25	485	13528	0.05304892985783509	0.3268280695285777	PRKCA, BCL10, PTK2B, JUN	4462845360824740
GOTERM_BP_FAT	GO:0051174~regulation of phosphorus metabolic process	4	1465201465201460	25	485	13528	0.05304892985783509	0.3268280695285777	PRKCA, BCL10, PTK2B, JUN	4462845360824740
GOTERM_BP_FAT	GO:0010608~posttranscriptional regulation of gene expression	3	1098901098901090	25	211	13528	0.05337828915069116	0.32629384056948796	PRKCA, MAPK1, PTK2B	7693649289099520
GOTERM_MF_FAT	GO:0019899~enzyme binding	4	1465201465201460	24	523	12983	0.06332406112166136	0.3379520110567349	BCL10, MAPK1, KAT2B, PTK2B	4137348629700440
GOTERM_BP_FAT	GO:0019725~cellular homeostasis	8	293040293040293	25	466	13528	1.14404e+11	4.49199e+12	PRKCA, PTK2B, JUN, GRIN2A, BCL2L1, MYC, DDIT3, PRKCB	9289613733905570
UP_SEQ_FEATURE	domain:Protein kinase	7	2564102564102560	25	469	19113	1.95428e+10	0.002927161098298603	PRKCA, MAPK1, PTK2, PTK2B, PRKCG, MAPK8, PRKCB	1.14107e+16
INTERPRO	IPR017441:Protein kinase, ATP binding site	7	2564102564102560	24	455	16659	2.73079e+10	0.001119014378278771	PRKCA, MAPK1, PTK2, PTK2B, PRKCG, MAPK8, PRKCB	1.06788e+16
GOTERM_BP_FAT	GO:0042592~homeostatic process	9	3296703296703290	25	751	13528	2.88449e+11	9.96396e+11	PRKCA, JMJD6, PTK2B, JUN, GRIN2A, BCL2L1, MYC, DDIT3, PRKCB	648479360852197
INTERPRO	IPR000719:Protein kinase, core	7	2564102564102560	24	476	16659	3.51878e+11	9.61354e+11	PRKCA, MAPK1, PTK2, PTK2B, PRKCG, MAPK8, PRKCB	1.02077e+16
GOTERM_BP_FAT	GO:0006873~cellular ion homeostasis	7	2564102564102560	25	374	13528	3.78469e+11	0.0012103896046777862	PRKCA, PTK2B, JUN, GRIN2A, BCL2L1, MYC, PRKCB	1.01279e+16
KEGG_PATHWAY	hsa04912:GnRH signaling pathway	6	2197802197802190	22	98	5085	3.82354e+10	6.4025e+11	PRKCA, MAPK1, PTK2B, JUN, MAPK8, PRKCB	1415120593692020
GOTERM_BP_FAT	GO:0055082~cellular chemical homeostasis	7	2564102564102560	25	380	13528	4.13772e+11	0.001232020226503261	PRKCA, PTK2B, JUN, GRIN2A, BCL2L1, MYC, PRKCB	9968000000000000
UP_SEQ_FEATURE	binding site:ATP	7	2564102564102560	25	542	19113	4.40412e+10	0.0032977107469696065	PRKCA, MAPK1, PTK2, PTK2B, PRKCG, MAPK8, PRKCB	9873874538745380
GOTERM_BP_FAT	GO:0050801~ion homeostasis	7	2564102564102560	25	409	13528	6.23771e+10	0.0017949031849817665	PRKCA, PTK2B, JUN, GRIN2A, BCL2L1, MYC, PRKCB	9261222493887530
GOTERM_BP_FAT	GO:0008284~positive regulation of cell proliferation	7	2564102564102560	25	414	13528	6.67363e+10	0.0018583392437453439	PRKCA, MAPK1, PTK2B, JUN, BCL2L1, NGFR, MYC	914937198067633
KEGG_PATHWAY	hsa04670:Leukocyte transendothelial migration	6	2197802197802190	22	118	5085	9.34185e+10	0.0012510832504406544	PRKCA, PTK2, PTK2B, PRKCG, CTNNA1, PRKCB	1.17527e+16
GOTERM_BP_FAT	GO:0009612~response to mechanical stimulus	4	1465201465201460	25	56	13528	1.27863e+12	0.0033422955165800516	PRKCA, PTK2B, JUN, MYC	3865142857142850
UP_SEQ_FEATURE	active site:Proton acceptor	7	2564102564102560	25	658	19113	1.28817e+12	0.0064205888688886326	PRKCA, MAPK1, PTK2, PTK2B, PRKCG, MAPK8, PRKCB	8133191489361700
SP_PIR_KEYWORDS	kinase	7	2564102564102560	25	688	19235	1.58792e+12	0.0030444013419786975	PRKCA, MAPK1, PTK2, PTK2B, PRKCG, MAPK8, PRKCB	7828197674418600
BIOCARTA	h_biopeptidesPathway:Bioactive Peptide Induced Signaling Pathway	5	1.8315e+16	16	30	1437	1.80023e+12	0.004894040382456444	PRKCA, MAPK1, PTK2B, MAPK8, PRKCB	1496875
GOTERM_BP_FAT	GO:0048878~chemical homeostasis	7	2564102564102560	25	512	13528	2.14559e+12	0.005283112371624155	PRKCA, PTK2B, JUN, GRIN2A, BCL2L1, MYC, PRKCB	7398125
GOTERM_BP_FAT	GO:0042127~regulation of cell proliferation	8	293040293040293	25	787	13528	3.17405e+12	0.007589979860254448	PRKCA, MAPK1, KAT2B, PTK2B, JUN, BCL2L1, NGFR, MYC	5500584498094020
GOTERM_MF_FAT	GO:0004672~protein kinase activity	7	2564102564102560	24	606	12983	5.15071e+11	0.03666325777040591	PRKCA, MAPK1, PTK2, PTK2B, PRKCG, MAPK8, PRKCB	6248693619361930
GOTERM_BP_FAT	GO:0006468~protein amino acid phosphorylation	7	2564102564102560	25	667	13528	8.81152e+10	0.018405362654796087	PRKCA, MAPK1, PTK2, PTK2B, PRKCG, MAPK8, PRKCB	5678920539730130
BIOCARTA	h_ionPathway:Ion Channel and Phorbal Esters Signaling Pathway	3	1098901098901090	16	5	1437	9.99349e+10	0.012036261382478042	PRKCA, PTK2B, PRKCB	5.38875e+16
GOTERM_BP_FAT	GO:0014070~response to organic cyclic substance	4	1465201465201460	25	121	13528	0.0012316218241716825	0.022881483835870076	PRKCA, PTK2B, JUN, BCL2L1	1.78883e+16
KEGG_PATHWAY	hsa04650:Natural killer cell mediated cytotoxicity	5	1.8315e+16	22	133	5085	0.0018942575611226088	0.010530463467831486	PRKCA, MAPK1, PTK2B, PRKCG, PRKCB	8689336978810660
GOTERM_BP_FAT	GO:0016310~phosphorylation	7	2564102564102560	25	800	13528	0.002252529901171067	0.03677559409992759	PRKCA, MAPK1, PTK2, PTK2B, PRKCG, MAPK8, PRKCB	4734800000000000
KEGG_PATHWAY	hsa04020:Calcium signaling pathway	5	1.8315e+16	22	176	5085	0.005230751016842457	0.018323731171371427	PRKCA, PTK2B, GRIN2A, PRKCG, PRKCB	6566373966942140
GOTERM_BP_FAT	GO:0006796~phosphate metabolic process	7	2564102564102560	25	973	13528	0.0059650540286566986	0.07425163712427052	PRKCA, MAPK1, PTK2, PTK2B, PRKCG, MAPK8, PRKCB	3.89295e+16
GOTERM_BP_FAT	GO:0006793~phosphorus metabolic process	7	2564102564102560	25	973	13528	0.0059650540286566986	0.07425163712427052	PRKCA, MAPK1, PTK2, PTK2B, PRKCG, MAPK8, PRKCB	3.89295e+16
GOTERM_BP_FAT	GO:0030005~cellular di-, tri-valent inorganic cation homeostasis	4	1465201465201460	25	227	13528	0.0072751254460038045	0.0861821945416611	PRKCA, PTK2B, MYC, PRKCB	9535154185022020
GOTERM_BP_FAT	GO:0010605~negative regulation of macromolecule metabolic process	6	2197802197802190	25	734	13528	0.008329070051468266	0.09303804366086099	PRKCA, JUN, GRIN2A, PRKCG, BCL2L1, MYC	4.42332e+16
GOTERM_BP_FAT	GO:0055066~di-, tri-valent inorganic cation homeostasis	4	1465201465201460	25	239	13528	0.008379271875571238	0.0923858246796988	PRKCA, PTK2B, MYC, PRKCB	9056401673640160
GOTERM_BP_FAT	GO:0030003~cellular cation homeostasis	4	1465201465201460	25	254	13528	0.009892132653060683	0.10180398646993916	PRKCA, PTK2B, MYC, PRKCB	8521574803149600
GOTERM_BP_FAT	GO:0055080~cation homeostasis	4	1465201465201460	25	286	13528	0.013626141895848012	0.12875881074871798	PRKCA, PTK2B, MYC, PRKCB	7568111888111880
GOTERM_BP_FAT	GO:0007242~intracellular signaling cascade	7	2564102564102560	25	1256	13528	0.0197844886636949	0.16943315220721067	PRKCA, BCL10, MAPK1, PTK2B, PRKCG, MAPK8, PRKCB	3.0158e+16
GOTERM_BP_FAT	GO:0048511~rhythmic process	3	1098901098901090	25	128	13528	0.02140063953515375	0.17860077464940882	JUN, GRIN2A, BCL2L1	126825
GOTERM_BP_FAT	GO:0042391~regulation of membrane potential	3	1098901098901090	25	134	13528	0.023311649265456744	0.18949715512834875	JUN, GRIN2A, BCL2L1	1.21146e+16
GOTERM_BP_FAT	GO:0001932~regulation of protein amino acid phosphorylation	3	1098901098901090	25	173	13528	0.03732936063403529	0.2666219909217682	PRKCA, PTK2B, JUN	9383583815028900
GOTERM_BP_FAT	GO:0006874~cellular calcium ion homeostasis	3	1098901098901090	25	183	13528	0.041338758048748155	0.28661929962050336	PRKCA, PTK2B, PRKCB	8870819672131140
GOTERM_BP_FAT	GO:0055074~calcium ion homeostasis	3	1098901098901090	25	188	13528	0.04340257360122942	0.29652602550740315	PRKCA, PTK2B, PRKCB	8634893617021270
GOTERM_BP_FAT	GO:0006875~cellular metal ion homeostasis	3	1098901098901090	25	196	13528	0.04678414261154425	0.3090041758511043	PRKCA, PTK2B, PRKCB	8282448979591830
GOTERM_BP_FAT	GO:0055065~metal ion homeostasis	3	1098901098901090	25	205	13528	0.05070184828342862	0.3258822504286134	PRKCA, PTK2B, PRKCB	7918829268292680
SP_PIR_KEYWORDS	cytoplasm	7	2564102564102560	25	3332	19235	0.2256872363915384	0.5711799932073053	PRKCA, BCL10, CASP6, PTK2B, CASP7, CTNNA1, PRKCB	1.61639e+16
GOTERM_BP_FAT	GO:0009725~response to hormone stimulus	7	2564102564102560	25	367	13528	3.40394e+09	0.0011305362574737243	PRKCA, CASP6, MAPK1, KAT2B, PTK2B, TH, BCL2L1	1.03211e+16
GOTERM_BP_FAT	GO:0048545~response to steroid hormone stimulus	4	1465201465201460	25	192	13528	0.004573423034233166	0.05911163771366612	PRKCA, CASP6, MAPK1, TH	1.12733e+16
GOTERM_BP_FAT	GO:0043627~response to estrogen stimulus	3	1098901098901090	25	105	13528	0.014735651799396524	0.13562956221300393	PRKCA, CASP6, MAPK1	1.54606e+16
GOTERM_CC_FAT	GO:0043005~neuron projection	7	2564102564102560	22	342	12782	1.35628e+10	8.1344e+11	MYO5A, MAPK1, PTK2B, TH, GRIN2A, NEFH, PRKCG	1.18918e+16
GOTERM_BP_FAT	GO:0045471~response to ethanol	4	1465201465201460	25	64	13528	1.904e+12	0.004827183977021199	PRKCA, PTK2B, TH, GRIN2A	33.82
GOTERM_CC_FAT	GO:0044456~synapse part	3	1098901098901090	22	246	12782	0.060948872312269656	0.3018664551836956	PTK2B, TH, GRIN2A	7085365853658530
GOTERM_CC_FAT	GO:0045202~synapse	3	1098901098901090	22	355	12782	0.11433530637398724	0.441667646472259	PTK2B, TH, GRIN2A	4909859154929570
GOTERM_BP_FAT	GO:0009725~response to hormone stimulus	7	2564102564102560	25	367	13528	3.40394e+09	0.0011305362574737243	PRKCA, CASP6, MAPK1, KAT2B, PTK2B, TH, BCL2L1	1.03211e+16
GOTERM_BP_FAT	GO:0001666~response to hypoxia	3	1098901098901090	25	134	13528	0.023311649265456744	0.18949715512834875	PTK2B, TH, BCL2L1	1.21146e+16
GOTERM_BP_FAT	GO:0070482~response to oxygen levels	3	1098901098901090	25	141	13528	0.02562730953583778	0.2009298802040289	PTK2B, TH, BCL2L1	115131914893617
KEGG_PATHWAY	hsa04012:ErbB signaling pathway	8	293040293040293	22	87	5085	3.22096e+07	2.15804e+09	PRKCA, MAPK1, PTK2, JUN, PRKCG, MAPK8, MYC, PRKCB	2.12539e+16
BIOCARTA	h_At1rPathway:Angiotensin II mediated activation of JNK Pathway via Pyk2 dependent signaling	7	2564102564102560	16	27	1437	1.09218e+08	1.19047e+10	PRKCA, MAPK1, PTK2, PTK2B, JUN, MAPK8, ATF2	2.32847e+16
KEGG_PATHWAY	hsa05200:Pathways in cancer	10	3.663e+16	22	328	5085	2.55165e+10	8.54769e+09	PRKCA, MAPK1, PTK2, JUN, PRKCG, MAPK8, BCL2L1, CTNNA1, MYC, PRKCB	7046840354767180
INTERPRO	IPR014375:Protein kinase C, alpha/beta/gamma types	3	1098901098901090	24	3	16659	5.46556e+08	4.48077e+12	PRKCA, PRKCG, PRKCB	694125
KEGG_PATHWAY	hsa04010:MAPK signaling pathway	9	3296703296703290	22	267	5085	5.82667e+09	1.30121e+12	PRKCA, MAPK1, JUN, PRKCG, MAPK8, MYC, DDIT3, PRKCB, ATF2	7791113381001020
PIR_SUPERFAMILY	PIRSF000550:PKC_alpha	3	1098901098901090	19	3	7396	1.67603e+11	3.35152e+11	PRKCA, PRKCG, PRKCB	3892631578947360
UP_SEQ_FEATURE	domain:Protein kinase	7	2564102564102560	25	469	19113	1.95428e+10	0.002927161098298603	PRKCA, MAPK1, PTK2, PTK2B, PRKCG, MAPK8, PRKCB	1.14107e+16
INTERPRO	IPR017441:Protein kinase, ATP binding site	7	2564102564102560	24	455	16659	2.73079e+10	0.001119014378278771	PRKCA, MAPK1, PTK2, PTK2B, PRKCG, MAPK8, PRKCB	1.06788e+16
INTERPRO	IPR000719:Protein kinase, core	7	2564102564102560	24	476	16659	3.51878e+11	9.61354e+11	PRKCA, MAPK1, PTK2, PTK2B, PRKCG, MAPK8, PRKCB	1.02077e+16
KEGG_PATHWAY	hsa04912:GnRH signaling pathway	6	2197802197802190	22	98	5085	3.82354e+10	6.4025e+11	PRKCA, MAPK1, PTK2B, JUN, MAPK8, PRKCB	1415120593692020
GOTERM_BP_FAT	GO:0007611~learning or memory	5	1.8315e+16	25	111	13528	4.0193e+10	0.0012394976877461161	PRKCA, JUN, TH, GRIN2A, PRKCG	2.43748e+16
UP_SEQ_FEATURE	binding site:ATP	7	2564102564102560	25	542	19113	4.40412e+10	0.0032977107469696065	PRKCA, MAPK1, PTK2, PTK2B, PRKCG, MAPK8, PRKCB	9873874538745380
SP_PIR_KEYWORDS	serine/threonine-specific protein kinase	4	1465201465201460	25	60	19235	5.5739e+11	0.002671971589210842	PRKCA, MAPK1, PRKCG, PRKCB	5129333333333330
INTERPRO	IPR015745:Protein kinase C	3	1098901098901090	24	9	16659	6.52568e+10	0.0013369126991388258	PRKCA, PRKCG, PRKCB	231375
KEGG_PATHWAY	hsa04670:Leukocyte transendothelial migration	6	2197802197802190	22	118	5085	9.34185e+10	0.0012510832504406544	PRKCA, PTK2, PTK2B, PRKCG, CTNNA1, PRKCB	1.17527e+16
BIOCARTA	h_pyk2Pathway:Links between Pyk2 and Map Kinases	5	1.8315e+16	16	26	1437	1.00674e+12	0.003651341512982742	PRKCA, MAPK1, PTK2B, JUN, MAPK8	1.72716e+16
SP_PIR_KEYWORDS	phosphotransferase	5	1.8315e+16	25	201	19235	1.04379e+12	0.0025020955585414173	PRKCA, MAPK1, PRKCG, MAPK8, PRKCB	1.91393e+16
KEGG_PATHWAY	hsa04510:Focal adhesion	7	2564102564102560	22	201	5085	1.16787e+12	0.0013033510192064224	PRKCA, MAPK1, PTK2, JUN, PRKCG, MAPK8, PRKCB	8049525101763900
UP_SEQ_FEATURE	active site:Proton acceptor	7	2564102564102560	25	658	19113	1.28817e+12	0.0064205888688886326	PRKCA, MAPK1, PTK2, PTK2B, PRKCG, MAPK8, PRKCB	8133191489361700
UP_SEQ_FEATURE	nucleotide phosphate-binding region:ATP	8	293040293040293	25	962	19113	1.3027e+12	0.004873514441072646	PRKCA, MYO5A, MAPK1, PTK2, PTK2B, PRKCG, MAPK8, PRKCB	6357754677754670
KEGG_PATHWAY	hsa04720:Long-term potentiation	5	1.8315e+16	22	68	5085	1.47516e+12	0.001411049714896473	PRKCA, MAPK1, GRIN2A, PRKCG, PRKCB	1.69953e+16
SP_PIR_KEYWORDS	kinase	7	2564102564102560	25	688	19235	1.58792e+12	0.0030444013419786975	PRKCA, MAPK1, PTK2, PTK2B, PRKCG, MAPK8, PRKCB	7828197674418600
BIOCARTA	h_biopeptidesPathway:Bioactive Peptide Induced Signaling Pathway	5	1.8315e+16	16	30	1437	1.80023e+12	0.004894040382456444	PRKCA, MAPK1, PTK2B, MAPK8, PRKCB	1496875
SP_PIR_KEYWORDS	ATP	5	1.8315e+16	25	236	19235	1.9353e+10	0.0030919949530929802	PRKCA, MAPK1, PRKCG, MAPK8, PRKCB	1.63008e+16
KEGG_PATHWAY	hsa04370:VEGF signaling pathway	5	1.8315e+16	22	75	5085	2.16059e+12	0.0018080550870651635	PRKCA, MAPK1, PTK2, PRKCG, PRKCB	1.54091e+16
BIOCARTA	h_metPathway:Signaling of Hepatocyte Growth Factor Receptor	5	1.8315e+16	16	34	1437	2.97164e+11	0.005384725863745832	MAPK1, PTK2, PTK2B, JUN, MAPK8	1.32077e+16
KEGG_PATHWAY	hsa04310:Wnt signaling pathway	6	2197802197802190	22	151	5085	2.9925e+11	0.0022256031288303557	PRKCA, JUN, PRKCG, MAPK8, MYC, PRKCB	9184226369656830
GOTERM_MF_FAT	GO:0004697~protein kinase C activity	3	1098901098901090	24	15	12983	3.10838e+12	0.04407753423334948	PRKCA, PRKCG, PRKCB	1.08192e+16
UP_SEQ_FEATURE	metal ion-binding site:Calcium 3; via carbonyl oxygen	3	1098901098901090	25	21	19113	3.12746e+12	0.009339951681123004	PRKCA, PRKCG, PRKCB	1.09217e+16
BIOCARTA	h_Ccr5Pathway:Pertussis toxin-insensitive CCR5 Signaling in Macrophage	4	1465201465201460	16	14	1437	3.13115e+12	0.004864539608355978	PRKCA, PTK2B, JUN, MAPK8	2.56607e+16
UP_SEQ_FEATURE	zinc finger region:Phorbol-ester/DAG-type 1	3	1098901098901090	25	22	19113	3.43757e+12	0.007340407776633251	PRKCA, PRKCG, PRKCB	1.04253e+16
UP_SEQ_FEATURE	zinc finger region:Phorbol-ester/DAG-type 2	3	1098901098901090	25	22	19113	3.43757e+12	0.007340407776633251	PRKCA, PRKCG, PRKCB	1.04253e+16
INTERPRO	IPR002290:Serine/threonine protein kinase	5	1.8315e+16	24	259	16659	4.00484e+12	0.0036429337724505073	PRKCA, MAPK1, PRKCG, MAPK8, PRKCB	1.34001e+16
GOTERM_MF_FAT	GO:0004672~protein kinase activity	7	2564102564102560	24	606	12983	5.15071e+11	0.03666325777040591	PRKCA, MAPK1, PTK2, PTK2B, PRKCG, MAPK8, PRKCB	6248693619361930
KEGG_PATHWAY	hsa04960:Aldosterone-regulated sodium reabsorption	4	1465201465201460	22	41	5085	5.85146e+11	0.003913943000595443	PRKCA, MAPK1, PRKCG, PRKCB	2254988913525490
UP_SEQ_FEATURE	metal ion-binding site:Calcium 3	3	1098901098901090	25	30	19113	6.43376e+11	0.01066905571099308	PRKCA, PRKCG, PRKCB	76452
SP_PIR_KEYWORDS	acetylation	11	4029304029304020	25	2635	19235	7.14618e+11	0.009756082503788455	PRKCA, BCL10, MAPK1, PTK2, KAT2B, CASP7, PRKCG, MAPK8, CTNNA1, MYC, PRKCB	3211916508538890
UP_SEQ_FEATURE	metal ion-binding site:Calcium 1; via carbonyl oxygen	3	1098901098901090	25	32	19113	7.32472e+11	0.01093093026659786	PRKCA, PRKCG, PRKCB	7167375
BIOCARTA	h_arenrf2Pathway:Oxidative Stress Induced Gene Expression Via Nrf2	4	1465201465201460	16	19	1437	8.07666e+11	0.010948516774939687	PRKCA, MAPK1, JUN, MAPK8	1.89079e+16
GOTERM_BP_FAT	GO:0006468~protein amino acid phosphorylation	7	2564102564102560	25	667	13528	8.81152e+10	0.018405362654796087	PRKCA, MAPK1, PTK2, PTK2B, PRKCG, MAPK8, PRKCB	5678920539730130
SP_PIR_KEYWORDS	atp-binding	8	293040293040293	25	1326	19235	8.88815e+10	0.010613798365608051	PRKCA, MYO5A, MAPK1, PTK2, PTK2B, PRKCG, MAPK8, PRKCB	4641930618401200
UP_SEQ_FEATURE	metal ion-binding site:Calcium 2; via carbonyl oxygen	3	1098901098901090	25	39	19113	0.0010884242975370904	0.014740511749235297	PRKCA, PRKCG, PRKCB	5880923076923070
SP_PIR_KEYWORDS	serine/threonine-protein kinase	5	1.8315e+16	25	381	19235	0.0011762802854281974	0.01247589748192679	PRKCA, MAPK1, PRKCG, MAPK8, PRKCB	1009711286089230
SP_PIR_KEYWORDS	transferase	8	293040293040293	25	1394	19235	0.0011948092038773356	0.011411416328753421	PRKCA, MAPK1, PTK2, KAT2B, PTK2B, PRKCG, MAPK8, PRKCB	4415494978479190
GOTERM_BP_FAT	GO:0007610~behavior	6	2197802197802190	25	469	13528	0.001206547445382614	0.022913112042533323	PRKCA, MAPK1, JUN, TH, GRIN2A, PRKCG	6922643923240930
GOTERM_BP_FAT	GO:0032268~regulation of cellular protein metabolic process	6	2197802197802190	25	474	13528	0.0012650106027305684	0.023000739754191923	PRKCA, BCL10, MAPK1, PTK2B, JUN, PRKCG	6849620253164550
INTERPRO	IPR008271:Serine/threonine protein kinase, active site	5	1.8315e+16	24	354	16659	0.0012892446712528143	0.010522870098885972	PRKCA, MAPK1, PRKCG, MAPK8, PRKCB	9804025423728810
KEGG_PATHWAY	hsa05223:Non-small cell lung cancer	4	1465201465201460	22	54	5085	0.0013153063051836954	0.007984636567377468	PRKCA, MAPK1, PRKCG, PRKCB	1712121212121210
INTERPRO	IPR017442:Serine/threonine protein kinase-related	5	1.8315e+16	24	359	16659	0.0013577312899039238	0.010077029863386433	PRKCA, MAPK1, PRKCG, MAPK8, PRKCB	9667479108635090
INTERPRO	IPR017892:Protein kinase, C-terminal	3	1098901098901090	24	40	16659	0.0013775657386170478	0.009375627748877902	PRKCA, PRKCG, PRKCB	5.20594e+16
BIOCARTA	h_cxcr4Pathway:CXCR4 Signaling Pathway	4	1465201465201460	16	23	1437	0.0014393454368431364	0.01557756181368597	PRKCA, MAPK1, PTK2, PTK2B	1.56196e+16
UP_SEQ_FEATURE	metal ion-binding site:Calcium 1	3	1098901098901090	25	45	19113	0.0014475020717253182	0.017943939269043252	PRKCA, PRKCG, PRKCB	5.0968e+16
SP_PIR_KEYWORDS	autophosphorylation	3	1098901098901090	25	49	19235	0.0016929081770639166	0.014678200738911573	PRKCA, PRKCG, PRKCB	4710612244897950
SMART	SM00220:S_TKc	5	1.8315e+16	20	259	9079	0.0017882694052617492	0.017739472320079996	PRKCA, MAPK1, PRKCG, MAPK8, PRKCB	8763513513513510
KEGG_PATHWAY	hsa04650:Natural killer cell mediated cytotoxicity	5	1.8315e+16	22	133	5085	0.0018942575611226088	0.010530463467831486	PRKCA, MAPK1, PTK2B, PRKCG, PRKCB	8689336978810660
KEGG_PATHWAY	hsa05214:Glioma	4	1465201465201460	22	63	5085	0.0020560504730943252	0.01055141543652982	PRKCA, MAPK1, PRKCG, PRKCB	1.46753e+16
UP_SEQ_FEATURE	domain:AGC-kinase C-terminal	3	1098901098901090	25	55	19113	0.0021546925038940404	0.024581490849842957	PRKCA, PRKCG, PRKCB	4170109090909090
UP_SEQ_FEATURE	metal ion-binding site:Calcium 2	3	1098901098901090	25	55	19113	0.0021546925038940404	0.024581490849842957	PRKCA, PRKCG, PRKCB	4170109090909090
GOTERM_BP_FAT	GO:0016310~phosphorylation	7	2564102564102560	25	800	13528	0.002252529901171067	0.03677559409992759	PRKCA, MAPK1, PTK2, PTK2B, PRKCG, MAPK8, PRKCB	4734800000000000
BIOCARTA	h_agrPathway:Agrin in Postsynaptic Differentiation	4	1465201465201460	16	27	1437	0.0023179598298426057	0.022733154059670135	MAPK1, PTK2, JUN, MAPK8	1.33056e+16
INTERPRO	IPR000961:AGC-kinase, C-terminal	3	1098901098901090	24	55	16659	0.0025898918173191347	0.015074272148913437	PRKCA, PRKCG, PRKCB	3.78614e+16
KEGG_PATHWAY	hsa04730:Long-term depression	4	1465201465201460	22	69	5085	0.0026698365504466094	0.012712664337182988	PRKCA, MAPK1, PRKCG, PRKCB	1.33992e+16
BIOCARTA	h_fcer1Pathway:Fc Epsilon Receptor I Signaling in Mast Cells	4	1465201465201460	16	30	1437	0.003157025495867867	0.026163950613853015	MAPK1, JUN, MAPK8, PRKCB	11975
SP_PIR_KEYWORDS	nucleotide-binding	8	293040293040293	25	1686	19235	0.0035766251737762503	0.028257369206467153	PRKCA, MYO5A, MAPK1, PTK2, PTK2B, PRKCG, MAPK8, PRKCB	3650771055753260
KEGG_PATHWAY	hsa04664:Fc epsilon RI signaling pathway	4	1465201465201460	22	78	5085	0.0037850677723119267	0.01575462070271183	PRKCA, MAPK1, MAPK8, PRKCB	1.18531e+16
GOTERM_BP_FAT	GO:0007243~protein kinase cascade	5	1.8315e+16	25	370	13528	0.0037920530192173036	0.053239725203220956	PRKCA, BCL10, MAPK1, PTK2B, MAPK8	7312432432432430
INTERPRO	IPR002219:Protein kinase C-like, phorbol ester/diacylglycerol binding	3	1098901098901090	24	67	16659	0.0038174866986674903	0.020691787676887397	PRKCA, PRKCG, PRKCB	3.10802e+16
GOTERM_BP_FAT	GO:0000165~MAPKKK cascade	4	1465201465201460	25	184	13528	0.004059993518737003	0.055116027187532945	PRKCA, MAPK1, PTK2B, MAPK8	1.17635e+16
GOTERM_BP_FAT	GO:0051248~negative regulation of protein metabolic process	4	1465201465201460	25	187	13528	0.004248144433589182	0.056712690878964245	PRKCA, JUN, GRIN2A, PRKCG	1.15748e+16
GOTERM_BP_FAT	GO:0050890~cognition	7	2564102564102560	25	909	13528	0.004272685479480648	0.056165865295210504	PRKCA, MAPK1, JUN, TH, GRIN2A, PRKCG, MYC	4167040704070400
UP_SEQ_FEATURE	domain:C2	3	1098901098901090	25	80	19113	0.0044982291977197575	0.047155955646101644	PRKCA, PRKCG, PRKCB	286695
BIOCARTA	h_integrinPathway:Integrin Signaling Pathway	4	1465201465201460	16	34	1437	0.004537002061684296	0.03478478042891986	MAPK1, PTK2, JUN, MAPK8	1.05662e+16
BIOCARTA	h_tcrPathway:T Cell Receptor Signaling Pathway	4	1465201465201460	16	34	1437	0.004537002061684296	0.03478478042891986	PRKCA, JUN, MAPK8, PRKCB	1.05662e+16
KEGG_PATHWAY	hsa05210:Colorectal cancer	4	1465201465201460	22	84	5085	0.004665838532826983	0.018263097666234573	MAPK1, JUN, MAPK8, MYC	1.10065e+16
KEGG_PATHWAY	hsa04020:Calcium signaling pathway	5	1.8315e+16	22	176	5085	0.005230751016842457	0.018323731171371427	PRKCA, PTK2B, GRIN2A, PRKCG, PRKCB	6566373966942140
KEGG_PATHWAY	hsa04540:Gap junction	4	1465201465201460	22	89	5085	0.005487670269302744	0.018265449687129842	PRKCA, MAPK1, PRKCG, PRKCB	1.03882e+16
SMART	SM00133:S_TK_X	3	1098901098901090	20	55	9079	0.0057679751887974706	0.028509094016959557	PRKCA, PRKCG, PRKCB	2476090909090900
GOTERM_BP_FAT	GO:0006796~phosphate metabolic process	7	2564102564102560	25	973	13528	0.0059650540286566986	0.07425163712427052	PRKCA, MAPK1, PTK2, PTK2B, PRKCG, MAPK8, PRKCB	3.89295e+16
GOTERM_BP_FAT	GO:0006793~phosphorus metabolic process	7	2564102564102560	25	973	13528	0.0059650540286566986	0.07425163712427052	PRKCA, MAPK1, PTK2, PTK2B, PRKCG, MAPK8, PRKCB	3.89295e+16
BIOCARTA	h_keratinocytePathway:Keratinocyte Differentiation	4	1465201465201460	16	38	1437	0.0062364134921352185	0.04444202205321357	PRKCA, MAPK1, JUN, MAPK8	9453947368421050
GOTERM_MF_FAT	GO:0019992~diacylglycerol binding	3	1098901098901090	24	68	12983	0.006369954457732604	0.14309905917845178	PRKCA, PRKCG, PRKCB	2.38658e+16
GOTERM_MF_FAT	GO:0004674~protein serine/threonine kinase activity	5	1.8315e+16	24	430	12983	0.006372684708380524	0.12403401826689298	PRKCA, MAPK1, PRKCG, MAPK8, PRKCB	6290213178294570
KEGG_PATHWAY	hsa04666:Fc gamma R-mediated phagocytosis	4	1465201465201460	22	95	5085	0.006582896727015421	0.020851545517822534	PRKCA, MAPK1, PRKCG, PRKCB	9732057416267940
KEGG_PATHWAY	hsa04916:Melanogenesis	4	1465201465201460	22	99	5085	0.007380870253978184	0.022308862650359806	PRKCA, MAPK1, PRKCG, PRKCB	9338842975206610
BIOCARTA	h_cdMacPathway:Cadmium induces DNA synthesis and proliferation in macrophages	3	1098901098901090	16	13	1437	0.007426747642291205	0.04951560117440079	PRKCA, MAPK1, JUN	2072596153846150
GOTERM_BP_FAT	GO:0048584~positive regulation of response to stimulus	4	1465201465201460	25	236	13528	0.008094476429398808	0.0917112655731962	PRKCA, BCL10, MAPK1, PRKCG	9171525423728810
GOTERM_BP_FAT	GO:0010605~negative regulation of macromolecule metabolic process	6	2197802197802190	25	734	13528	0.008329070051468266	0.09303804366086099	PRKCA, JUN, GRIN2A, PRKCG, BCL2L1, MYC	4.42332e+16
GOTERM_CC_FAT	GO:0019717~synaptosome	3	1098901098901090	22	85	12782	0.008454876292377941	0.11958537936541691	PRKCA, GRIN2A, PRKCG	2.05059e+16
SMART	SM00109:C1	3	1098901098901090	20	67	9079	0.00846064834782784	0.03341551538427978	PRKCA, PRKCG, PRKCB	2.03261e+16
GOTERM_BP_FAT	GO:0006928~cell motion	5	1.8315e+16	25	475	13528	0.009125445759421645	0.09656028443757536	PRKCA, PTK2, PTK2B, MAPK8, NGFR	5696
INTERPRO	IPR018029:C2 membrane targeting protein	3	1098901098901090	24	106	16659	0.009300066072759738	0.04675741239394848	PRKCA, PRKCG, PRKCB	1964504716981130
KEGG_PATHWAY	hsa04270:Vascular smooth muscle contraction	4	1465201465201460	22	112	5085	0.010361847138800765	0.02988628619012168	PRKCA, MAPK1, PRKCG, PRKCB	8254870129870130
GOTERM_MF_FAT	GO:0005524~ATP binding	8	293040293040293	24	1477	12983	0.011512931591283714	0.17019299660125242	PRKCA, MYO5A, MAPK1, PTK2, PTK2B, PRKCG, MAPK8, PRKCB	2.93004e+16
GOTERM_MF_FAT	GO:0032559~adenyl ribonucleotide binding	8	293040293040293	24	1497	12983	0.012362026311794866	0.16503589305961042	PRKCA, MYO5A, MAPK1, PTK2, PTK2B, PRKCG, MAPK8, PRKCB	2890892896904920
BIOCARTA	h_41bbPathway:The 4-1BB-dependent immune response	3	1098901098901090	16	17	1437	0.01264016212705102	0.07832472958414716	JUN, MAPK8, ATF2	1.58493e+16
GOTERM_BP_FAT	GO:0040017~positive regulation of locomotion	3	1098901098901090	25	98	13528	0.01292455425212555	0.12386111533055721	PRKCA, MAPK1, PTK2B	1656489795918360
KEGG_PATHWAY	hsa04722:Neurotrophin signaling pathway	4	1465201465201460	22	124	5085	0.013657714290246504	0.03766297340951974	MAPK1, JUN, MAPK8, NGFR	7.45601e+16
INTERPRO	IPR000008:C2 calcium-dependent membrane targeting	3	1098901098901090	24	137	16659	0.01517099068347354	0.0710854154727183	PRKCA, PRKCG, PRKCB	1.51998e+16
BIOCARTA	h_sppaPathway:Aspirin Blocks Signaling Pathway Involved in Platelet Activation	3	1098901098901090	16	19	1437	0.015702504732603727	0.09139230195088577	PRKCA, MAPK1, PTK2	1.41809e+16
GOTERM_MF_FAT	GO:0030554~adenyl nucleotide binding	8	293040293040293	24	1577	12983	0.01622967212130346	0.17939824278073535	PRKCA, MYO5A, MAPK1, PTK2, PTK2B, PRKCG, MAPK8, PRKCB	2.74424e+16
KEGG_PATHWAY	hsa04530:Tight junction	4	1465201465201460	22	134	5085	0.01681579487800693	0.04443218592523346	PRKCA, PRKCG, CTNNA1, PRKCB	6899592944369060
GOTERM_MF_FAT	GO:0001883~purine nucleoside binding	8	293040293040293	24	1601	12983	0.017546060023276223	0.1791733533734533	PRKCA, MYO5A, MAPK1, PTK2, PTK2B, PRKCG, MAPK8, PRKCB	2.7031e+16
GOTERM_MF_FAT	GO:0001882~nucleoside binding	8	293040293040293	24	1612	12983	0.01817476312185237	0.17301624491902645	PRKCA, MYO5A, MAPK1, PTK2, PTK2B, PRKCG, MAPK8, PRKCB	2.68466e+16
GOTERM_BP_FAT	GO:0031400~negative regulation of protein modification process	3	1098901098901090	25	119	13528	0.018665497462531506	0.16217831135332506	PRKCA, JUN, PRKCG	1.36417e+16
BIOCARTA	h_CCR3Pathway:CCR3 signaling in Eosinophils	3	1098901098901090	16	21	1437	0.01905259355374878	0.09953011734709505	PRKCA, MAPK1, PTK2	1.28304e+16
GOTERM_BP_FAT	GO:0007242~intracellular signaling cascade	7	2564102564102560	25	1256	13528	0.0197844886636949	0.16943315220721067	PRKCA, BCL10, MAPK1, PTK2B, PRKCG, MAPK8, PRKCB	3.0158e+16
KEGG_PATHWAY	hsa05110:Vibrio cholerae infection	3	1098901098901090	22	56	5085	0.021878832352074277	0.05155750965640704	PRKCA, PRKCG, PRKCB	1.23823e+16
BIOCARTA	h_edg1Pathway:Phospholipids as signalling intermediaries	3	1098901098901090	16	23	1437	0.022678810012559638	0.10743587968694235	PRKCA, MAPK1, PTK2	1.17147e+16
GOTERM_BP_FAT	GO:0006417~regulation of translation	3	1098901098901090	25	137	13528	0.024292843160103213	0.1949235158876511	PRKCA, MAPK1, PTK2B	1184934306569340
BIOCARTA	h_pdgfPathway:PDGF Signaling Pathway	3	1098901098901090	16	25	1437	0.02656983927049534	0.11512017750368575	PRKCA, JUN, MAPK8	107775
GOTERM_CC_FAT	GO:0000267~cell fraction	6	2197802197802190	22	1083	12782	0.0280097477429549	0.20329915734361514	PRKCA, MAPK1, CASP7, GRIN2A, PRKCG, ATF2	3218836565096950
BIOCARTA	h_bcrPathway:BCR Signaling Pathway	3	1098901098901090	16	26	1437	0.02861120429408614	0.1188824087643724	PRKCA, JUN, MAPK8	1036298076923070
BIOCARTA	h_egfPathway:EGF Signaling Pathway	3	1098901098901090	16	26	1437	0.02861120429408614	0.1188824087643724	PRKCA, JUN, MAPK8	1036298076923070
SMART	SM00239:C2	3	1098901098901090	20	137	9079	0.03268576992070568	0.10485802550007162	PRKCA, PRKCG, PRKCB	9940510948905100
GOTERM_MF_FAT	GO:0032555~purine ribonucleotide binding	8	293040293040293	24	1836	12983	0.03481960151294304	0.23697546622132593	PRKCA, MYO5A, MAPK1, PTK2, PTK2B, PRKCG, MAPK8, PRKCB	2.35712e+16
GOTERM_MF_FAT	GO:0032553~ribonucleotide binding	8	293040293040293	24	1836	12983	0.03481960151294304	0.23697546622132593	PRKCA, MYO5A, MAPK1, PTK2, PTK2B, PRKCG, MAPK8, PRKCB	2.35712e+16
KEGG_PATHWAY	hsa04070:Phosphatidylinositol signaling system	3	1098901098901090	22	74	5085	0.03670600121674679	0.08012649776956071	PRKCA, PRKCG, PRKCB	937039312039312
GOTERM_BP_FAT	GO:0001932~regulation of protein amino acid phosphorylation	3	1098901098901090	25	173	13528	0.03732936063403529	0.2666219909217682	PRKCA, PTK2B, JUN	9383583815028900
KEGG_PATHWAY	hsa04062:Chemokine signaling pathway	4	1465201465201460	22	187	5085	0.0399795339595654	0.08187929977825104	MAPK1, PTK2, PTK2B, PRKCB	4944093339815260
GOTERM_BP_FAT	GO:0032269~negative regulation of cellular protein metabolic process	3	1098901098901090	25	180	13528	0.04011920796108736	0.28152963067598646	PRKCA, JUN, PRKCG	9018666666666660
GOTERM_MF_FAT	GO:0017076~purine nucleotide binding	8	293040293040293	24	1918	12983	0.042945705229300246	0.2614641195437476	PRKCA, MYO5A, MAPK1, PTK2, PTK2B, PRKCG, MAPK8, PRKCB	2.25634e+16
BBID	3.T_cell_receptor	3	1098901098901090	9	16	358	0.044856490838035154	0.5416822385261897	PTK2, JUN, MAPK8	7458333333333330
GOTERM_BP_FAT	GO:0040012~regulation of locomotion	3	1098901098901090	25	192	13528	0.045081282237411084	0.3039423242826954	PRKCA, MAPK1, PTK2B	8455
GOTERM_CC_FAT	GO:0005626~insoluble fraction	5	1.8315e+16	22	839	12782	0.04509416081072123	0.27798694216734665	PRKCA, MAPK1, GRIN2A, PRKCG, ATF2	3462455303933250
BIOCARTA	h_mapkPathway:MAPKinase Signaling Pathway	4	1465201465201460	16	80	1437	0.046555617006395274	0.17507470676709147	MAPK1, JUN, MAPK8, ATF2	4490625
GOTERM_BP_FAT	GO:0010608~posttranscriptional regulation of gene expression	3	1098901098901090	25	211	13528	0.05337828915069116	0.32629384056948796	PRKCA, MAPK1, PTK2B	7693649289099520
KEGG_PATHWAY	hsa04620:Toll-like receptor signaling pathway	3	1098901098901090	22	101	5085	0.0642232799418255	0.12261066941127685	MAPK1, JUN, MAPK8	6865436543654360
SP_PIR_KEYWORDS	calcium	4	1465201465201460	25	803	19235	0.07654717858129086	0.28279382924864627	PRKCA, GRIN2A, PRKCG, PRKCB	3832627646326270
GOTERM_BP_FAT	GO:0033554~cellular response to stress	4	1465201465201460	25	566	13528	0.07689723760263423	0.4148648968760883	MAPK1, JUN, MAPK8, DDIT3	3.82417e+16
GOTERM_BP_FAT	GO:0016477~cell migration	3	1098901098901090	25	276	13528	0.08533438263345634	0.4422436806350857	PRKCA, PTK2, PTK2B	5881739130434780
GOTERM_MF_FAT	GO:0000166~nucleotide binding	8	293040293040293	24	2245	12983	0.0878249623660744	0.4261403480726004	PRKCA, MYO5A, MAPK1, PTK2, PTK2B, PRKCG, MAPK8, PRKCB	1.92769e+16
GOTERM_BP_FAT	GO:0048870~cell motility	3	1098901098901090	25	307	13528	0.10221411265389178	0.50103597874956	PRKCA, PTK2, PTK2B	5287817589576540
GOTERM_BP_FAT	GO:0051674~localization of cell	3	1098901098901090	25	307	13528	0.10221411265389178	0.50103597874956	PRKCA, PTK2, PTK2B	5287817589576540
GOTERM_CC_FAT	GO:0005624~membrane fraction	4	1465201465201460	22	809	12782	0.14418278957829528	0.5125698590365618	PRKCA, GRIN2A, PRKCG, ATF2	2.87268e+16
GOTERM_MF_FAT	GO:0008289~lipid binding	3	1098901098901090	24	450	12983	0.18878014568549184	0.6748824035412895	PRKCA, PRKCG, PRKCB	3606388888888880
GOTERM_MF_FAT	GO:0005509~calcium ion binding	4	1465201465201460	24	919	12983	0.22004892315747623	0.7239020864379575	PRKCA, GRIN2A, PRKCG, PRKCB	2.35455e+16
SP_PIR_KEYWORDS	metal-binding	6	2197802197802190	25	2972	19235	0.30888676639735574	0.6698984017373832	PRKCA, JMJD6, TH, PRKCG, PRKCB, ATF2	1.5533e+16
SP_PIR_KEYWORDS	zinc-finger	4	1465201465201460	25	1718	19235	0.36380311405016824	0.7316942799095691	PRKCA, PRKCG, PRKCB, ATF2	1.79139e+16
SP_PIR_KEYWORDS	zinc	4	1465201465201460	25	2189	19235	0.5248574931289418	0.8776785182480983	PRKCA, PRKCG, PRKCB, ATF2	1.40594e+16
GOTERM_MF_FAT	GO:0046914~transition metal ion binding	6	2197802197802190	24	2785	12983	0.5682240113825004	0.9777533296107899	PRKCA, JMJD6, TH, PRKCG, PRKCB, ATF2	1.16544e+16
GOTERM_MF_FAT	GO:0046872~metal ion binding	7	2564102564102560	24	4140	12983	0.7913716948419327	0.9987487992092177	PRKCA, JMJD6, TH, GRIN2A, PRKCG, PRKCB, ATF2	0.91466384863124
GOTERM_MF_FAT	GO:0043169~cation binding	7	2564102564102560	24	4179	12983	0.8000179830986514	0.9987291176745732	PRKCA, JMJD6, TH, GRIN2A, PRKCG, PRKCB, ATF2	0.9061278615298717
GOTERM_MF_FAT	GO:0008270~zinc ion binding	4	1465201465201460	24	2311	12983	0.803669511488574	0.9985799234380139	PRKCA, PRKCG, PRKCB, ATF2	0.9363190538006634
GOTERM_MF_FAT	GO:0043167~ion binding	7	2564102564102560	24	4241	12983	0.8132602726060075	0.9986067283621598	PRKCA, JMJD6, TH, GRIN2A, PRKCG, PRKCB, ATF2	0.8928810029081192
BIOCARTA	h_At1rPathway:Angiotensin II mediated activation of JNK Pathway via Pyk2 dependent signaling	7	2564102564102560	16	27	1437	1.09218e+08	1.19047e+10	PRKCA, MAPK1, PTK2, PTK2B, JUN, MAPK8, ATF2	2.32847e+16
BIOCARTA	h_metPathway:Signaling of Hepatocyte Growth Factor Receptor	5	1.8315e+16	16	34	1437	2.97164e+11	0.005384725863745832	MAPK1, PTK2, PTK2B, JUN, MAPK8	1.32077e+16
GOTERM_BP_FAT	GO:0001568~blood vessel development	4	1465201465201460	25	245	13528	0.008966556993068857	0.09612621033926805	PTK2, JMJD6, PTK2B, JUN	883461224489796
GOTERM_BP_FAT	GO:0001944~vasculature development	4	1465201465201460	25	251	13528	0.009577619114108447	0.09990275755744493	PTK2, JMJD6, PTK2B, JUN	8623426294820710
GOTERM_BP_FAT	GO:0001525~angiogenesis	3	1098901098901090	25	148	13528	0.028033431695648123	0.21404174883943827	PTK2, PTK2B, JUN	1.09686e+16
GOTERM_BP_FAT	GO:0048514~blood vessel morphogenesis	3	1098901098901090	25	211	13528	0.05337828915069116	0.32629384056948796	PTK2, PTK2B, JUN	7693649289099520
GOTERM_BP_FAT	GO:0007166~cell surface receptor linked signal transduction	7	2564102564102560	25	1856	13528	0.10050564062984978	0.497469036542284	BCL10, MAPK1, PTK2, JMJD6, PTK2B, JUN, GRIN2A	2.04086e+16
GOTERM_BP_FAT	GO:0007167~enzyme linked receptor protein signaling pathway	3	1098901098901090	25	342	13528	0.12229752172993454	0.5529335695643506	PTK2, PTK2B, JUN	4746666666666660
GOTERM_CC_FAT	GO:0043005~neuron projection	7	2564102564102560	22	342	12782	1.35628e+10	8.1344e+11	MYO5A, MAPK1, PTK2B, TH, GRIN2A, NEFH, PRKCG	1.18918e+16
GOTERM_CC_FAT	GO:0042995~cell projection	8	293040293040293	22	697	12782	8.25342e+10	0.0032960612117188814	MYO5A, MAPK1, PTK2, PTK2B, TH, GRIN2A, NEFH, PRKCG	6668579626972740
GOTERM_CC_FAT	GO:0030424~axon	4	1465201465201460	22	159	12782	0.0021308532291839217	0.04990665512545944	MAPK1, PTK2B, TH, NEFH	1.46164e+16
GOTERM_CC_FAT	GO:0005856~cytoskeleton	8	293040293040293	22	1381	12782	0.00502132899047054	0.0957772684616901	MYO5A, MAPK1, PTK2, PTK2B, GRIN2A, NEFH, CTNNA1, MYC	3.36568e+16
GOTERM_CC_FAT	GO:0043232~intracellular non-membrane-bounded organelle	9	3296703296703290	22	2596	12782	0.04656616954693099	0.2723256742039304	MYO5A, MAPK1, PTK2, PTK2B, JUN, GRIN2A, NEFH, CTNNA1, MYC	2.01425e+16
GOTERM_CC_FAT	GO:0043228~non-membrane-bounded organelle	9	3296703296703290	22	2596	12782	0.04656616954693099	0.2723256742039304	MYO5A, MAPK1, PTK2, PTK2B, JUN, GRIN2A, NEFH, CTNNA1, MYC	2.01425e+16
GOTERM_CC_FAT	GO:0030054~cell junction	4	1465201465201460	22	518	12782	0.05117270235823068	0.2823396154829708	PTK2, PTK2B, GRIN2A, CTNNA1	4486486486486480
GOTERM_CC_FAT	GO:0044430~cytoskeletal part	5	1.8315e+16	22	952	12782	0.06624732305227793	0.30066065144171195	MYO5A, PTK2B, GRIN2A, NEFH, MYC	3.05147e+16
SP_PIR_KEYWORDS	Apoptosis	6	2197802197802190	25	381	19235	9.25457e+09	0.0029572168263668486	BCL10, CASP10, CASP6, CASP7, BCL2L1, NGFR	1.21165e+16
INTERPRO	IPR002138:Peptidase C14, caspase non-catalytic subunit p10	3	1098901098901090	24	12	16659	1.19336e+12	0.0019553151099521715	CASP10, CASP6, CASP7	17353125
INTERPRO	IPR016129:Peptidase C14, ICE, catalytic subunit p20, active site	3	1098901098901090	24	12	16659	1.19336e+12	0.0019553151099521715	CASP10, CASP6, CASP7	17353125
INTERPRO	IPR015917:Peptidase C14, caspase precursor p45, core	3	1098901098901090	24	14	16659	1.64263e+12	0.002242592424423151	CASP10, CASP6, CASP7	1.48741e+16
INTERPRO	IPR011600:Peptidase C14, caspase catalytic	3	1098901098901090	24	15	16659	1.89375e+12	0.0022161429350721074	CASP10, CASP6, CASP7	1.38825e+16
INTERPRO	IPR001309:Peptidase C14, ICE, catalytic subunit p20	3	1098901098901090	24	15	16659	1.89375e+12	0.0022161429350721074	CASP10, CASP6, CASP7	1.38825e+16
BIOCARTA	h_fasPathway:FAS signaling pathway ( CD95 )	5	1.8315e+16	16	31	1437	2.05413e+11	0.004468444420986262	CASP10, CASP6, JUN, CASP7, MAPK8	1.44859e+16
INTERPRO	IPR002398:Peptidase C14, caspase precursor p45	3	1098901098901090	24	20	16659	3.41242e+11	0.0034922163624842018	CASP10, CASP6, CASP7	1.04119e+16
SMART	SM00115:CASc	3	1098901098901090	20	14	9079	3.7199e+12	0.007413560622252291	CASP10, CASP6, CASP7	97275
KEGG_PATHWAY	hsa04210:Apoptosis	4	1465201465201460	22	87	5085	0.005149173639731656	0.01903243589535286	CASP10, CASP6, CASP7, BCL2L1	1.0627e+16
GOTERM_MF_FAT	GO:0004197~cysteine-type endopeptidase activity	3	1098901098901090	24	72	12983	0.0071167043838950795	0.12142275692499305	CASP10, CASP6, CASP7	2.25399e+16
SP_PIR_KEYWORDS	thiol protease	3	1098901098901090	25	126	19235	0.010692789212198942	0.07631791666364107	CASP10, CASP6, CASP7	1831904761904760
BIOCARTA	h_caspasePathway:Caspase Cascade in Apoptosis	3	1098901098901090	16	24	1437	0.024591918529314586	0.11130507561279257	CASP10, CASP6, CASP7	1.12266e+16
GOTERM_MF_FAT	GO:0008234~cysteine-type peptidase activity	3	1098901098901090	24	141	12983	0.025525229063495868	0.20889603667754664	CASP10, CASP6, CASP7	1.15098e+16
SP_PIR_KEYWORDS	zymogen	3	1098901098901090	25	206	19235	0.02698869101035339	0.16062799007369832	CASP10, CASP6, CASP7	1120485436893200
BIOCARTA	h_deathPathway:Induction of apoptosis through DR3 and DR4/5 Death Receptors	3	1098901098901090	16	30	1437	0.03738438108308431	0.14762739664979274	CASP10, CASP6, CASP7	898125
SP_PIR_KEYWORDS	Protease	3	1098901098901090	25	484	19235	0.12139376276758956	0.37988648722613516	CASP10, CASP6, CASP7	4769008264462800
GOTERM_MF_FAT	GO:0004175~endopeptidase activity	3	1098901098901090	24	375	12983	0.14166327876205675	0.5734066744170054	CASP10, CASP6, CASP7	4.32767e+16
GOTERM_MF_FAT	GO:0070011~peptidase activity, acting on L-amino acid peptides	3	1098901098901090	24	549	12983	0.25385259078640715	0.7687279357302527	CASP10, CASP6, CASP7	2956056466302360
GOTERM_MF_FAT	GO:0008233~peptidase activity	3	1098901098901090	24	574	12983	0.2705173462783734	0.7822763105690853	CASP10, CASP6, CASP7	2827308362369330
GOTERM_BP_FAT	GO:0006508~proteolysis	4	1465201465201460	25	1054	13528	0.28649873764492506	0.8495170123024838	CASP10, CASP6, CASP7, NGFR	2053586337760910
SP_PIR_KEYWORDS	hydrolase	3	1098901098901090	25	1555	19235	0.5887771411763372	0.9064868554330606	CASP10, CASP6, CASP7	1.48437e+16
GOTERM_BP_FAT	GO:0007611~learning or memory	5	1.8315e+16	25	111	13528	4.0193e+10	0.0012394976877461161	PRKCA, JUN, TH, GRIN2A, PRKCG	2.43748e+16
GOTERM_BP_FAT	GO:0045471~response to ethanol	4	1465201465201460	25	64	13528	1.904e+12	0.004827183977021199	PRKCA, PTK2B, TH, GRIN2A	33.82
GOTERM_BP_FAT	GO:0007610~behavior	6	2197802197802190	25	469	13528	0.001206547445382614	0.022913112042533323	PRKCA, MAPK1, JUN, TH, GRIN2A, PRKCG	6922643923240930
GOTERM_BP_FAT	GO:0007268~synaptic transmission	5	1.8315e+16	25	298	13528	0.001731173330618907	0.02949681912975577	PRKCA, MAPK1, PTK2, TH, GRIN2A	9079194630872480
GOTERM_BP_FAT	GO:0019226~transmission of nerve impulse	5	1.8315e+16	25	350	13528	0.0031063290909136335	0.04686698694032565	PRKCA, MAPK1, PTK2, TH, GRIN2A	7730285714285710
GOTERM_BP_FAT	GO:0050877~neurological system process	8	293040293040293	25	1210	13528	0.003996483663070893	0.05514079041657849	PRKCA, MAPK1, PTK2, JUN, TH, GRIN2A, PRKCG, MYC	3.57765e+16
GOTERM_BP_FAT	GO:0050890~cognition	7	2564102564102560	25	909	13528	0.004272685479480648	0.056165865295210504	PRKCA, MAPK1, JUN, TH, GRIN2A, PRKCG, MYC	4167040704070400
GOTERM_BP_FAT	GO:0048545~response to steroid hormone stimulus	4	1465201465201460	25	192	13528	0.004573423034233166	0.05911163771366612	PRKCA, CASP6, MAPK1, TH	1.12733e+16
GOTERM_BP_FAT	GO:0007612~learning	3	1098901098901090	25	60	13528	0.005014325684910267	0.06368864099972282	JUN, TH, GRIN2A	27056
GOTERM_BP_FAT	GO:0007267~cell-cell signaling	5	1.8315e+16	25	600	13528	0.020079655387486038	0.17009172244462267	PRKCA, MAPK1, PTK2, TH, GRIN2A	4509333333333330
GOTERM_BP_FAT	GO:0007626~locomotory behavior	3	1098901098901090	25	274	13528	0.08427817805470743	0.4429749045376058	PRKCA, MAPK1, TH	5924671532846710
GOTERM_BP_FAT	GO:0044057~regulation of system process	3	1098901098901090	25	309	13528	0.10333409384187534	0.5024506028283839	PRKCA, TH, GRIN2A	5253592233009700
GOTERM_BP_FAT	GO:0007600~sensory perception	4	1465201465201460	25	810	13528	0.17094653317203923	0.6652673546521992	MAPK1, TH, GRIN2A, MYC	2.6722e+16
SP_PIR_KEYWORDS	cell membrane	5	1.8315e+16	25	2194	19235	0.2902136605108986	0.6540798129201937	PRKCA, PTK2, PTK2B, GRIN2A, CTNNA1	1753418413855970
KEGG_PATHWAY	hsa04912:GnRH signaling pathway	6	2197802197802190	22	98	5085	3.82354e+10	6.4025e+11	PRKCA, MAPK1, PTK2B, JUN, MAPK8, PRKCB	1415120593692020
KEGG_PATHWAY	hsa04510:Focal adhesion	7	2564102564102560	22	201	5085	1.16787e+12	0.0013033510192064224	PRKCA, MAPK1, PTK2, JUN, PRKCG, MAPK8, PRKCB	8049525101763900
BIOCARTA	h_fcer1Pathway:Fc Epsilon Receptor I Signaling in Mast Cells	4	1465201465201460	16	30	1437	0.003157025495867867	0.026163950613853015	MAPK1, JUN, MAPK8, PRKCB	11975
KEGG_PATHWAY	hsa04662:B cell receptor signaling pathway	4	1465201465201460	22	75	5085	0.0033864858740803227	0.015037760471667272	BCL10, MAPK1, JUN, PRKCB	1.23273e+16
GOTERM_BP_FAT	GO:0008104~protein localization	4	1465201465201460	25	882	13528	0.20351495660836955	0.7303607443894922	MAPK1, JUN, GRIN2A, PRKCB	24540589569161
GOTERM_BP_FAT	GO:0015031~protein transport	3	1098901098901090	25	762	13528	0.39507091584575893	0.9382014084827041	MAPK1, JUN, PRKCB	2.13039e+16
GOTERM_BP_FAT	GO:0045184~establishment of protein localization	3	1098901098901090	25	769	13528	0.3995615055136223	0.9396230200034412	MAPK1, JUN, PRKCB	2111001300390110
GOTERM_CC_FAT	GO:0005654~nucleoplasm	8	293040293040293	22	882	12782	3.58647e+10	0.01070363998871271	CASP6, MAPK1, KAT2B, JUN, CASP7, MAPK8, NGFR, MYC	526984126984127
KEGG_PATHWAY	hsa05210:Colorectal cancer	4	1465201465201460	22	84	5085	0.004665838532826983	0.018263097666234573	MAPK1, JUN, MAPK8, MYC	1.10065e+16
GOTERM_CC_FAT	GO:0031981~nuclear lumen	8	293040293040293	22	1450	12782	0.0065826346920447405	0.107044216056426	CASP6, MAPK1, KAT2B, JUN, CASP7, MAPK8, NGFR, MYC	3.20552e+16
KEGG_PATHWAY	hsa04722:Neurotrophin signaling pathway	4	1465201465201460	22	124	5085	0.013657714290246504	0.03766297340951974	MAPK1, JUN, MAPK8, NGFR	7.45601e+16
GOTERM_CC_FAT	GO:0070013~intracellular organelle lumen	8	293040293040293	22	1779	12782	0.019596881028265956	0.21140102088277168	CASP6, MAPK1, KAT2B, JUN, CASP7, MAPK8, NGFR, MYC	2.6127e+16
GOTERM_CC_FAT	GO:0043233~organelle lumen	8	293040293040293	22	1820	12782	0.022020824338017064	0.21565919879586792	CASP6, MAPK1, KAT2B, JUN, CASP7, MAPK8, NGFR, MYC	2.55385e+16
GOTERM_CC_FAT	GO:0031974~membrane-enclosed lumen	8	293040293040293	22	1856	12782	0.024321776498260346	0.20330553041955535	CASP6, MAPK1, KAT2B, JUN, CASP7, MAPK8, NGFR, MYC	2.50431e+16
GOTERM_BP_FAT	GO:0007423~sensory organ development	4	1465201465201460	25	229	13528	0.007452688257071115	0.08701105418977706	CASP6, JMJD6, TH, MYC	9451877729257640
GOTERM_BP_FAT	GO:0043010~camera-type eye development	3	1098901098901090	25	107	13528	0.015272218710818058	0.13877926335046442	CASP6, JMJD6, TH	1.51716e+16
GOTERM_BP_FAT	GO:0001654~eye development	3	1098901098901090	25	132	13528	0.022666986654417833	0.18645211285023877	CASP6, JMJD6, TH	1.22982e+16
KEGG_PATHWAY	hsa04912:GnRH signaling pathway	6	2197802197802190	22	98	5085	3.82354e+10	6.4025e+11	PRKCA, MAPK1, PTK2B, JUN, MAPK8, PRKCB	1415120593692020
UP_SEQ_FEATURE	domain:Leucine-zipper	4	1465201465201460	25	110	19113	3.43754e+10	0.008558501318874256	JUN, MYC, DDIT3, ATF2	2.78007e+16
GOTERM_BP_FAT	GO:0045935~positive regulation of nucleobase, nucleoside, nucleotide and nucleic acid metabolic process	7	2564102564102560	25	624	13528	6.20266e+11	0.01400822023911874	BCL10, MAPK1, JUN, TFAP2B, PRKCG, MYC, DDIT3	6070256410256410
GOTERM_BP_FAT	GO:0051173~positive regulation of nitrogen compound metabolic process	7	2564102564102560	25	644	13528	7.32744e+11	0.016107907968877178	BCL10, MAPK1, JUN, TFAP2B, PRKCG, MYC, DDIT3	5.88174e+16
GOTERM_BP_FAT	GO:0010557~positive regulation of macromolecule biosynthetic process	7	2564102564102560	25	654	13528	7.94652e+11	0.017024713156245652	BCL10, MAPK1, PTK2B, JUN, TFAP2B, MYC, DDIT3	5791804281345560
GOTERM_BP_FAT	GO:0031328~positive regulation of cellular biosynthetic process	7	2564102564102560	25	685	13528	0.0010128383983961436	0.02015540712103625	BCL10, MAPK1, PTK2B, JUN, TFAP2B, MYC, DDIT3	5529693430656930
GOTERM_BP_FAT	GO:0009891~positive regulation of biosynthetic process	7	2564102564102560	25	695	13528	0.0010923286999297947	0.02123243646810591	BCL10, MAPK1, PTK2B, JUN, TFAP2B, MYC, DDIT3	5450129496402870
GOTERM_MF_FAT	GO:0008134~transcription factor binding	6	2197802197802190	24	513	12983	0.0017594417292630588	0.08159295512380493	BCL10, KAT2B, JUN, TFAP2B, DDIT3, ATF2	6326998050682260
INTERPRO	IPR004827:Basic-leucine zipper (bZIP) transcription factor	3	1098901098901090	24	53	16659	0.0024073123020969815	0.015087911153439215	JUN, DDIT3, ATF2	3929009433962260
GOTERM_BP_FAT	GO:0045941~positive regulation of transcription	6	2197802197802190	25	564	13528	0.0027205014298801963	0.043438066569130185	BCL10, MAPK1, JUN, TFAP2B, MYC, DDIT3	575659574468085
BIOCARTA	h_pcafpathway:The information-processing pathway at the IFN-beta enhancer	3	1098901098901090	16	8	1437	0.002747833701074208	0.024684084592915156	KAT2B, JUN, ATF2	336796875
GOTERM_BP_FAT	GO:0010628~positive regulation of gene expression	6	2197802197802190	25	581	13528	0.0030944385783010834	0.04752001378727133	BCL10, MAPK1, JUN, TFAP2B, MYC, DDIT3	558815834767642
KEGG_PATHWAY	hsa04662:B cell receptor signaling pathway	4	1465201465201460	22	75	5085	0.0033864858740803227	0.015037760471667272	BCL10, MAPK1, JUN, PRKCB	1.23273e+16
GOTERM_MF_FAT	GO:0003712~transcription cofactor activity	5	1.8315e+16	24	363	12983	0.0034929742168179866	0.11912713619438975	BCL10, KAT2B, TFAP2B, DDIT3, ATF2	7451216712580340
SMART	SM00338:BRLZ	3	1098901098901090	20	53	9079	0.005365708584783153	0.035232080676104394	JUN, DDIT3, ATF2	2.56953e+16
GOTERM_MF_FAT	GO:0003713~transcription coactivator activity	4	1465201465201460	24	214	12983	0.006131488179403648	0.16335926116099686	BCL10, KAT2B, TFAP2B, ATF2	1.01114e+16
GOTERM_BP_FAT	GO:0002237~response to molecule of bacterial origin	3	1098901098901090	25	86	13528	0.010068094169916504	0.10231610460147	BCL10, MAPK1, JUN	1887627906976740
GOTERM_MF_FAT	GO:0046983~protein dimerization activity	5	1.8315e+16	24	542	12983	0.01413940046891575	0.17114763860647708	JUN, TFAP2B, BCL2L1, DDIT3, ATF2	4990390528905280
GOTERM_BP_FAT	GO:0007050~cell cycle arrest	3	1098901098901090	25	103	13528	0.014207527061143163	0.1324718739119275	KAT2B, MYC, DDIT3	1.57608e+16
UP_SEQ_FEATURE	DNA-binding region:Basic motif	3	1098901098901090	25	161	19113	0.017236521518940007	0.14222455992326088	JUN, MYC, ATF2	1.42457e+16
GOTERM_MF_FAT	GO:0043565~sequence-specific DNA binding	5	1.8315e+16	24	607	12983	0.02062801647908386	0.18248787418054457	JUN, TFAP2B, MYC, DDIT3, ATF2	4.456e+16
SP_PIR_KEYWORDS	Proto-oncogene	3	1098901098901090	25	230	19235	0.03305785858867757	0.17290442436473563	JUN, MYC, DDIT3	1.00357e+16
GOTERM_BP_FAT	GO:0051252~regulation of RNA metabolic process	8	293040293040293	25	1813	13528	0.03351678037976889	0.24664625737841606	BCL10, KAT2B, JMJD6, JUN, TFAP2B, MYC, DDIT3, ATF2	2.38773e+16
SP_PIR_KEYWORDS	transcription regulation	7	2564102564102560	25	2026	19235	0.03455030653513258	0.17099313309832764	KAT2B, JMJD6, JUN, TFAP2B, MYC, DDIT3, ATF2	2.65834e+16
GOTERM_MF_FAT	GO:0016563~transcription activator activity	4	1465201465201460	24	410	12983	0.03466016649005417	0.24735406768113422	BCL10, KAT2B, TFAP2B, ATF2	5277642276422760
SP_PIR_KEYWORDS	Transcription	7	2564102564102560	25	2071	19235	0.037956343766805165	0.17758804345946766	KAT2B, JMJD6, JUN, TFAP2B, MYC, DDIT3, ATF2	2.60058e+16
GOTERM_MF_FAT	GO:0030528~transcription regulator activity	7	2564102564102560	24	1512	12983	0.043648575885061366	0.2548361749921838	BCL10, KAT2B, JUN, TFAP2B, MYC, DDIT3, ATF2	2.50444e+16
GOTERM_BP_FAT	GO:0009617~response to bacterium	3	1098901098901090	25	193	13528	0.04550474856752059	0.3040734336739451	BCL10, MAPK1, JUN	8411191709844550
SP_PIR_KEYWORDS	chromosomal rearrangement	3	1098901098901090	25	279	19235	0.04692153382701546	0.18917888529525717	BCL10, MYC, DDIT3	8273118279569890
GOTERM_BP_FAT	GO:0045893~positive regulation of transcription, DNA-dependent	4	1465201465201460	25	477	13528	0.05092792938421333	0.3247760301515914	BCL10, JUN, TFAP2B, MYC	453769392033543
GOTERM_BP_FAT	GO:0051254~positive regulation of RNA metabolic process	4	1465201465201460	25	481	13528	0.05198300875654845	0.3257887852953555	BCL10, JUN, TFAP2B, MYC	449995841995842
KEGG_PATHWAY	hsa04660:T cell receptor signaling pathway	3	1098901098901090	22	108	5085	0.07223276964396458	0.1336986366184828	BCL10, MAPK1, JUN	6420454545454540
GOTERM_BP_FAT	GO:0045449~regulation of transcription	9	3296703296703290	25	2601	13528	0.07354666394665993	0.4053031421776786	BCL10, MAPK1, KAT2B, JMJD6, JUN, TFAP2B, MYC, DDIT3, ATF2	1.87239e+16
GOTERM_BP_FAT	GO:0006355~regulation of transcription, DNA-dependent	7	2564102564102560	25	1773	13528	0.08441246249582586	0.4410221744110516	BCL10, KAT2B, JUN, TFAP2B, MYC, DDIT3, ATF2	2136401579244210
GOTERM_MF_FAT	GO:0003700~transcription factor activity	5	1.8315e+16	24	975	12983	0.08937057713596089	0.4189925046987124	JUN, TFAP2B, MYC, DDIT3, ATF2	2.77415e+16
SP_PIR_KEYWORDS	activator	3	1098901098901090	25	520	19235	0.13646690902776817	0.4064785902572514	TFAP2B, MYC, ATF2	4438846153846150
GOTERM_BP_FAT	GO:0045944~positive regulation of transcription from RNA polymerase II promoter	3	1098901098901090	25	371	13528	0.1396329951041912	0.5943957649542617	JUN, TFAP2B, MYC	4.37563e+16
GOTERM_BP_FAT	GO:0006350~transcription	7	2564102564102560	25	2101	13528	0.15726955586515692	0.634210323032617	KAT2B, JMJD6, JUN, TFAP2B, MYC, DDIT3, ATF2	1.80287e+16
SP_PIR_KEYWORDS	dna-binding	5	1.8315e+16	25	1868	19235	0.19942424845814216	0.5335465201842648	JUN, TFAP2B, MYC, DDIT3, ATF2	2.05942e+16
GOTERM_CC_FAT	GO:0044451~nucleoplasm part	3	1098901098901090	22	555	12782	0.23101698787667416	0.6888546503369258	KAT2B, JUN, MYC	314054054054054
GOTERM_BP_FAT	GO:0022402~cell cycle process	3	1098901098901090	25	565	13528	0.26506118787873434	0.8263224968285149	KAT2B, MYC, DDIT3	2.8732e+16
SP_PIR_KEYWORDS	nucleus	8	293040293040293	25	4283	19235	0.2750599883572188	0.6427546164217762	KAT2B, JMJD6, JUN, TFAP2B, BCL2L1, MYC, DDIT3, ATF2	1.43712e+16
GOTERM_BP_FAT	GO:0006357~regulation of transcription from RNA polymerase II promoter	3	1098901098901090	25	727	13528	0.37243132946444923	0.9255054208633536	JUN, TFAP2B, MYC	2.23296e+16
GOTERM_MF_FAT	GO:0003677~DNA binding	5	1.8315e+16	24	2331	12983	0.6128762337961384	0.9845461337064213	JUN, TFAP2B, MYC, DDIT3, ATF2	1.16036e+16
KEGG_PATHWAY	hsa04670:Leukocyte transendothelial migration	6	2197802197802190	22	118	5085	9.34185e+10	0.0012510832504406544	PRKCA, PTK2, PTK2B, PRKCG, CTNNA1, PRKCB	1.17527e+16
BIOCARTA	h_cxcr4Pathway:CXCR4 Signaling Pathway	4	1465201465201460	16	23	1437	0.0014393454368431364	0.01557756181368597	PRKCA, MAPK1, PTK2, PTK2B	1.56196e+16
GOTERM_BP_FAT	GO:0048666~neuron development	5	1.8315e+16	25	339	13528	0.0027682322894322623	0.04338391669046693	PRKCA, PTK2, PTK2B, TH, NGFR	7981120943952800
GOTERM_BP_FAT	GO:0030182~neuron differentiation	5	1.8315e+16	25	438	13528	0.006886436530560127	0.08289053529741996	PRKCA, PTK2, PTK2B, TH, NGFR	617716894977169
GOTERM_BP_FAT	GO:0006928~cell motion	5	1.8315e+16	25	475	13528	0.009125445759421645	0.09656028443757536	PRKCA, PTK2, PTK2B, MAPK8, NGFR	5696
GOTERM_BP_FAT	GO:0031175~neuron projection development	4	1465201465201460	25	256	13528	0.010105152343332566	0.10148818139299765	PRKCA, PTK2, PTK2B, NGFR	8455
GOTERM_BP_FAT	GO:0030030~cell projection organization	4	1465201465201460	25	368	13528	0.026465200855718695	0.2050253958841174	PRKCA, PTK2, PTK2B, NGFR	5881739130434780
GOTERM_BP_FAT	GO:0051960~regulation of nervous system development	3	1098901098901090	25	192	13528	0.045081282237411084	0.3039423242826954	PRKCA, PTK2, NGFR	8455
GOTERM_BP_FAT	GO:0007409~axonogenesis	3	1098901098901090	25	193	13528	0.04550474856752059	0.3040734336739451	PRKCA, PTK2, NGFR	8411191709844550
GOTERM_BP_FAT	GO:0048667~cell morphogenesis involved in neuron differentiation	3	1098901098901090	25	209	13528	0.0524805004240111	0.32612757222468625	PRKCA, PTK2, NGFR	7.76727e+16
GOTERM_BP_FAT	GO:0048812~neuron projection morphogenesis	3	1098901098901090	25	213	13528	0.054281656489309126	0.32868349502761407	PRKCA, PTK2, NGFR	7621408450704220
GOTERM_BP_FAT	GO:0000904~cell morphogenesis involved in differentiation	3	1098901098901090	25	244	13528	0.06896274200827987	0.38976048768816196	PRKCA, PTK2, NGFR	665311475409836
GOTERM_BP_FAT	GO:0048858~cell projection morphogenesis	3	1098901098901090	25	245	13528	0.06945653777122039	0.3895883318342994	PRKCA, PTK2, NGFR	6625959183673460
GOTERM_BP_FAT	GO:0032990~cell part morphogenesis	3	1098901098901090	25	256	13528	0.07496647837575235	0.40903340859229964	PRKCA, PTK2, NGFR	634125
GOTERM_BP_FAT	GO:0000902~cell morphogenesis	3	1098901098901090	25	356	13528	0.1305948781287759	0.5732269233454778	PRKCA, PTK2, NGFR	4.56e+16
GOTERM_BP_FAT	GO:0032989~cellular component morphogenesis	3	1098901098901090	25	397	13528	0.15562374568711562	0.6350310162904669	PRKCA, PTK2, NGFR	4089068010075560
SP_PIR_KEYWORDS	cell membrane	5	1.8315e+16	25	2194	19235	0.2902136605108986	0.6540798129201937	PRKCA, PTK2, PTK2B, GRIN2A, CTNNA1	1753418413855970
KEGG_PATHWAY	hsa04670:Leukocyte transendothelial migration	6	2197802197802190	22	118	5085	9.34185e+10	0.0012510832504406544	PRKCA, PTK2, PTK2B, PRKCG, CTNNA1, PRKCB	1.17527e+16
GOTERM_CC_FAT	GO:0005912~adherens junction	3	1098901098901090	22	155	12782	0.026385071356151826	0.20482645396610266	PTK2, PTK2B, CTNNA1	1124516129032250
GOTERM_CC_FAT	GO:0070161~anchoring junction	3	1098901098901090	22	172	12782	0.031973581579236784	0.216292372590157	PTK2, PTK2B, CTNNA1	1.01337e+16
GOTERM_CC_FAT	GO:0030054~cell junction	4	1465201465201460	22	518	12782	0.05117270235823068	0.2823396154829708	PTK2, PTK2B, GRIN2A, CTNNA1	4486486486486480
GOTERM_CC_FAT	GO:0044459~plasma membrane part	8	293040293040293	22	2203	12782	0.05592047868804292	0.29197032069135176	BCL10, PTK2, PTK2B, TH, GRIN2A, BCL2L1, NGFR, CTNNA1	2.10985e+16
GOTERM_CC_FAT	GO:0005886~plasma membrane	11	4029304029304020	22	3777	12782	0.061428556076838475	0.29234458171634836	PRKCA, BCL10, PTK2, JMJD6, PTK2B, TH, GRIN2A, BCL2L1, NGFR, CTNNA1, PRKCB	1.69208e+16
SP_PIR_KEYWORDS	cell junction	3	1098901098901090	25	399	19235	0.0878301484165992	0.3076864104403497	PTK2, GRIN2A, CTNNA1	5784962406015030
SP_PIR_KEYWORDS	cell membrane	5	1.8315e+16	25	2194	19235	0.2902136605108986	0.6540798129201937	PRKCA, PTK2, PTK2B, GRIN2A, CTNNA1	1753418413855970
SP_PIR_KEYWORDS	membrane	9	3296703296703290	25	6256	19235	0.5427311818145373	0.8830771990200538	PRKCA, BCL10, PTK2, PTK2B, GRIN2A, BCL2L1, NGFR, CTNNA1, PRKCB	1.10687e+16
GOTERM_BP_FAT	GO:0043066~negative regulation of apoptosis	5	1.8315e+16	25	354	13528	0.0032360149725367644	0.047943322831804025	BCL10, MAPK8, BCL2L1, NGFR, MYC	7.64294e+16
GOTERM_BP_FAT	GO:0043069~negative regulation of programmed cell death	5	1.8315e+16	25	359	13528	0.0034033004425890194	0.0495159583509327	BCL10, MAPK8, BCL2L1, NGFR, MYC	7536490250696370
GOTERM_BP_FAT	GO:0060548~negative regulation of cell death	5	1.8315e+16	25	360	13528	0.0034374560295455736	0.0491748152015965	BCL10, MAPK8, BCL2L1, NGFR, MYC	7515555555555550
GOTERM_BP_FAT	GO:0006916~anti-apoptosis	3	1098901098901090	25	206	13528	0.05114438078491979	0.32363627474683343	BCL2L1, NGFR, MYC	7880388349514560
UP_SEQ_FEATURE	transmembrane region	3	1098901098901090	25	4911	19113	0.9925630539678195	1.0	GRIN2A, BCL2L1, NGFR	0.4670250458155161
SP_PIR_KEYWORDS	transmembrane	3	1098901098901090	25	4973	19235	0.9928839248162592	0.9999962495676711	GRIN2A, BCL2L1, NGFR	0.4641463905087472
GOTERM_CC_FAT	GO:0016021~integral to membrane	4	1465201465201460	22	5297	12782	0.9984175223685136	0.9999999999974234	BCL10, GRIN2A, BCL2L1, NGFR	0.4387389088163111
GOTERM_CC_FAT	GO:0031224~intrinsic to membrane	4	1465201465201460	22	5485	12782	0.99896262275627	0.9999999999988419	BCL10, GRIN2A, BCL2L1, NGFR	0.4237010027347311
GOTERM_BP_FAT	GO:0006461~protein complex assembly	4	1465201465201460	25	505	13528	0.05853976102930908	0.3431609285208116	BCL10, PTK2, PTK2B, MYC	428609900990099
GOTERM_BP_FAT	GO:0070271~protein complex biogenesis	4	1465201465201460	25	505	13528	0.05853976102930908	0.3431609285208116	BCL10, PTK2, PTK2B, MYC	428609900990099
GOTERM_BP_FAT	GO:0065003~macromolecular complex assembly	4	1465201465201460	25	665	13528	0.11145733574130691	0.5228208699747426	BCL10, PTK2, PTK2B, MYC	3254857142857140
GOTERM_BP_FAT	GO:0043933~macromolecular complex subunit organization	4	1465201465201460	25	710	13528	0.1289052246959107	0.5707194328625644	BCL10, PTK2, PTK2B, MYC	3.04856e+16
GOTERM_BP_FAT	GO:0044093~positive regulation of molecular function	3	1098901098901090	25	586	13528	0.279080313115421	0.8424280598994448	BCL10, PTK2B, MYC	2.77024e+16
