# Supplementary material for: Deciphering the effect of an oxovanadium(iv) complex with the flavonoid chrysin (VOChrys) on intracellular cell signalling pathways in an osteosarcoma cell line
Source: Royal Society of Chemistry journal article supplement (doi:10.1039/c6mt00045b), 2016-01-01
Supplement: c6mt00045b9.xlsx [file c6mt00045b9.xlsx]

## Sheet: t2t_F3183AF787DB1435825542240
Annotation Database Categories	Biological Term enriched	N proteins in term	%	N proteins in Total	Population Hits	Population Total	p.value	adj.p.value (Benjamini)	Proteins IDs	Fold Enrichment
KEGG_PATHWAY	hsa05214:Glioma	4	2.28571e+16	9	63	5085	9.71263e+10	0.004844778857512444	CCND1, GRB2, RAF1, MDM2	3587301587301580
KEGG_PATHWAY	hsa05220:Chronic myeloid leukemia	4	2.28571e+16	9	75	5085	1.63688e+11	0.004084168587028647	CCND1, GRB2, RAF1, MDM2	3.01333e+16
KEGG_PATHWAY	hsa05215:Prostate cancer	4	2.28571e+16	9	89	5085	2.72437e+12	0.004530940782284332	CCND1, GRB2, RAF1, MDM2	2539325842696620
GOTERM_CC_FAT	GO:0005829~cytosol	6	3428571428571420	9	1330	12782	5.17717e+11	0.05095865522445475	CDC6, CCND1, PTK2, GRB2, RAF1, MDM2	6407017543859640
KEGG_PATHWAY	hsa05200:Pathways in cancer	5	2857142857142850	9	328	5085	9.66725e+10	0.012017116438466813	CCND1, PTK2, GRB2, RAF1, MDM2	8612804878048780
KEGG_PATHWAY	hsa05219:Bladder cancer	3	1.71429e+16	9	42	5085	0.0018071984433830606	0.017925721988976018	CCND1, RAF1, MDM2	4.03571e+16
KEGG_PATHWAY	hsa05213:Endometrial cancer	3	1.71429e+16	9	52	5085	0.0027613401588227355	0.02277953509805053	CCND1, GRB2, RAF1	3259615384615380
KEGG_PATHWAY	hsa04510:Focal adhesion	4	2.28571e+16	9	201	5085	0.002941011752114489	0.020818420075738087	CCND1, PTK2, GRB2, RAF1	1.12438e+16
KEGG_PATHWAY	hsa05223:Non-small cell lung cancer	3	1.71429e+16	9	54	5085	0.002975298637101034	0.01845099244928594	CCND1, GRB2, RAF1	3138888888888880
KEGG_PATHWAY	hsa05221:Acute myeloid leukemia	3	1.71429e+16	9	58	5085	0.0034260419742050342	0.018885634895362102	CCND1, GRB2, RAF1	2922413793103440
SP_PIR_KEYWORDS	Proto-oncogene	3	1.71429e+16	9	230	19235	0.0038013155792030115	0.10966817415050012	CCND1, RAF1, MDM2	2.78768e+16
BIOCARTA	h_At1rPathway:Angiotensin II mediated activation of JNK Pathway via Pyk2 dependent signaling	3	1.71429e+16	7	27	1437	0.004870258204101448	0.30998634967762684	PTK2, GRB2, RAF1	2280952380952380
KEGG_PATHWAY	hsa05218:Melanoma	3	1.71429e+16	9	71	5085	0.005097865402073543	0.025230766165363683	CCND1, RAF1, MDM2	2387323943661970
UP_SEQ_FEATURE	mutagenesis site	5	2857142857142850	9	2045	19113	0.0064150903911895036	0.3585776394243474	CCND1, PTK2, GRB2, RAF1, MDM2	5192339038304800
KEGG_PATHWAY	hsa05210:Colorectal cancer	3	1.71429e+16	9	84	5085	0.007078297651802427	0.03177278140259754	CCND1, GRB2, RAF1	2.01786e+16
GOTERM_BP_FAT	GO:0007169~transmembrane receptor protein tyrosine kinase signaling pathway	3	1.71429e+16	9	224	13528	0.00715653315500807	0.3017046992500796	PTK2, GRB2, RAF1	2.0131e+16
KEGG_PATHWAY	hsa04012:ErbB signaling pathway	3	1.71429e+16	9	87	5085	0.00757808401616288	0.031198557976772623	PTK2, GRB2, RAF1	1.94828e+16
BIOCARTA	h_integrinPathway:Integrin Signaling Pathway	3	1.71429e+16	7	34	1437	0.007682585375298134	0.2540266784444781	PTK2, GRB2, RAF1	1811344537815120
BIOCARTA	h_metPathway:Signaling of Hepatocyte Growth Factor Receptor	3	1.71429e+16	7	34	1437	0.007682585375298134	0.2540266784444781	PTK2, GRB2, RAF1	1811344537815120
GOTERM_BP_FAT	GO:0007167~enzyme linked receptor protein signaling pathway	3	1.71429e+16	9	342	13528	0.01613236018679827	0.4565928238675022	PTK2, GRB2, RAF1	1.31852e+16
KEGG_PATHWAY	hsa04062:Chemokine signaling pathway	3	1.71429e+16	9	187	5085	0.03254572223574233	0.11145346845297632	PTK2, GRB2, RAF1	906417112299465
GOTERM_MF_FAT	GO:0004672~protein kinase activity	3	1.71429e+16	9	606	12983	0.0505113064983936	0.6199772871453559	CCND1, PTK2, RAF1	7141364136413640
GOTERM_BP_FAT	GO:0006468~protein amino acid phosphorylation	3	1.71429e+16	9	667	13528	0.05577190983425504	0.6826501296215943	CCND1, PTK2, RAF1	6760619690154920
GOTERM_BP_FAT	GO:0016310~phosphorylation	3	1.71429e+16	9	800	13528	0.07711963739782028	0.7375237072550519	CCND1, PTK2, RAF1	5636666666666660
GOTERM_BP_FAT	GO:0007166~cell surface receptor linked signal transduction	4	2.28571e+16	9	1856	13528	0.08472802802020156	0.7528860198201415	CCND1, PTK2, GRB2, RAF1	3.23946e+16
GOTERM_BP_FAT	GO:0006793~phosphorus metabolic process	3	1.71429e+16	9	973	13528	0.10833672336324908	0.8209339690994478	CCND1, PTK2, RAF1	4634463857485430
GOTERM_BP_FAT	GO:0006796~phosphate metabolic process	3	1.71429e+16	9	973	13528	0.10833672336324908	0.8209339690994478	CCND1, PTK2, RAF1	4634463857485430
GOTERM_BP_FAT	GO:0007242~intracellular signaling cascade	3	1.71429e+16	9	1256	13528	0.16583417300558234	0.925004672868996	CCND1, GRB2, RAF1	3.59023e+16
KEGG_PATHWAY	hsa05200:Pathways in cancer	5	2857142857142850	9	328	5085	9.66725e+10	0.012017116438466813	CCND1, PTK2, GRB2, RAF1, MDM2	8612804878048780
GOTERM_BP_FAT	GO:0065003~macromolecular complex assembly	4	2.28571e+16	9	665	13528	0.005499040113336104	0.33871221918935857	PTK2, GRB2, H3F3A, MDM2	9041269841269840
UP_SEQ_FEATURE	mutagenesis site	5	2857142857142850	9	2045	19113	0.0064150903911895036	0.3585776394243474	CCND1, PTK2, GRB2, RAF1, MDM2	5192339038304800
GOTERM_BP_FAT	GO:0043933~macromolecular complex subunit organization	4	2.28571e+16	9	710	13528	0.006609228169961032	0.32825061698024627	PTK2, GRB2, H3F3A, MDM2	8468231611893580
GOTERM_BP_FAT	GO:0006461~protein complex assembly	3	1.71429e+16	9	505	13528	0.03353897407776593	0.5738047280041032	PTK2, GRB2, MDM2	892937293729373
GOTERM_BP_FAT	GO:0070271~protein complex biogenesis	3	1.71429e+16	9	505	13528	0.03353897407776593	0.5738047280041032	PTK2, GRB2, MDM2	892937293729373
SP_PIR_KEYWORDS	acetylation	3	1.71429e+16	9	2635	19235	0.3015551937889014	0.9121863643422862	PTK2, GRB2, H3F3A	2433270082226430
GOTERM_CC_FAT	GO:0012506~vesicle membrane	3	1.71429e+16	9	151	12782	0.0037049051273608047	0.1709254141309854	CLTA, GRB2, MDM2	2821633554083880
GOTERM_CC_FAT	GO:0031090~organelle membrane	4	2.28571e+16	9	1096	12782	0.025359032059586388	0.47720945029843276	CLTA, GRB2, RAF1, MDM2	5183292781832920
GOTERM_CC_FAT	GO:0031988~membrane-bounded vesicle	3	1.71429e+16	9	568	12782	0.04619333251572365	0.6153204044509544	CLTA, GRB2, MDM2	7501173708920180
GOTERM_CC_FAT	GO:0031982~vesicle	3	1.71429e+16	9	670	12782	0.062248990551754466	0.6043938068462904	CLTA, GRB2, MDM2	6359203980099500
GOTERM_CC_FAT	GO:0012505~endomembrane system	3	1.71429e+16	9	782	12782	0.08186048637344251	0.659809591811821	CLTA, GRB2, MDM2	5448422847399820
GOTERM_BP_FAT	GO:0051329~interphase of mitotic cell cycle	3	1.71429e+16	9	103	13528	0.0015601806221068723	0.3740092544053959	CDC6, CCND1, MDM2	437799352750809
GOTERM_BP_FAT	GO:0051325~interphase	3	1.71429e+16	9	106	13528	0.0016513783171694147	0.21957099321586537	CDC6, CCND1, MDM2	4254088050314460
GOTERM_BP_FAT	GO:0007346~regulation of mitotic cell cycle	3	1.71429e+16	9	152	13528	0.003359306561051262	0.2857313807649199	CDC6, CCND1, MDM2	2.96667e+16
GOTERM_BP_FAT	GO:0051726~regulation of cell cycle	3	1.71429e+16	9	331	13528	0.015159350446077706	0.4803819206264124	CDC6, CCND1, MDM2	1.36234e+16
KEGG_PATHWAY	hsa04110:Cell cycle	3	1.71429e+16	9	125	5085	0.015234146067451024	0.05733448355558812	CDC6, CCND1, MDM2	1.356e+16
GOTERM_BP_FAT	GO:0000278~mitotic cell cycle	3	1.71429e+16	9	370	13528	0.018729521128246697	0.4675349392595253	CDC6, CCND1, MDM2	1.21874e+16
GOTERM_BP_FAT	GO:0022403~cell cycle phase	3	1.71429e+16	9	414	13528	0.0231504220174671	0.5047428017341367	CDC6, CCND1, MDM2	1.08921e+16
GOTERM_BP_FAT	GO:0022402~cell cycle process	3	1.71429e+16	9	565	13528	0.041245722493985906	0.6216784279712657	CDC6, CCND1, MDM2	7981120943952800
GOTERM_BP_FAT	GO:0007049~cell cycle	3	1.71429e+16	9	776	13528	0.07308250975760797	0.7589982508211376	CDC6, CCND1, MDM2	5810996563573880
GOTERM_BP_FAT	GO:0042127~regulation of cell proliferation	3	1.71429e+16	9	787	13528	0.07492324848516034	0.746990365815501	CDC6, CCND1, MDM2	5729775518847940
GOTERM_CC_FAT	GO:0005654~nucleoplasm	3	1.71429e+16	9	882	12782	0.10089684552116507	0.69686213722932	CDC6, CCND1, MDM2	483068783068783
GOTERM_CC_FAT	GO:0031981~nuclear lumen	3	1.71429e+16	9	1450	12782	0.22765494196080693	0.8863038616435294	CDC6, CCND1, MDM2	2938390804597700
GOTERM_CC_FAT	GO:0070013~intracellular organelle lumen	3	1.71429e+16	9	1779	12782	0.3084993293738637	0.9430738540140313	CDC6, CCND1, MDM2	2394978452314030
GOTERM_CC_FAT	GO:0043233~organelle lumen	3	1.71429e+16	9	1820	12782	0.3186770031688595	0.9372286780391925	CDC6, CCND1, MDM2	2.34103e+16
GOTERM_CC_FAT	GO:0031974~membrane-enclosed lumen	3	1.71429e+16	9	1856	12782	0.32761443772838056	0.9309287860730653	CDC6, CCND1, MDM2	2295617816091950
GOTERM_CC_FAT	GO:0043228~non-membrane-bounded organelle	5	2857142857142850	9	2596	12782	0.05910981948355312	0.6414315358997142	CDC6, PTK2, DMD, H3F3A, MDM2	2.7354e+16
GOTERM_CC_FAT	GO:0043232~intracellular non-membrane-bounded organelle	5	2857142857142850	9	2596	12782	0.05910981948355312	0.6414315358997142	CDC6, PTK2, DMD, H3F3A, MDM2	2.7354e+16
SP_PIR_KEYWORDS	cytoplasm	3	1.71429e+16	9	3332	19235	0.4157555786508321	0.9492237269517018	CDC6, DMD, MDM2	1924269707883150
SP_PIR_KEYWORDS	nucleus	3	1.71429e+16	9	4283	19235	0.5612427999452962	0.9848187813096857	CDC6, H3F3A, MDM2	1497003657872200
GOTERM_CC_FAT	GO:0009898~internal side of plasma membrane	3	1.71429e+16	9	316	12782	0.01545885432854733	0.40815636337189465	PTK2, CLTA, DMD	1.34831e+16
GOTERM_CC_FAT	GO:0005886~plasma membrane	5	2857142857142850	9	3777	12782	0.18593938539132848	0.8747917028531198	PTK2, CLTA, DMD, RAF1, MDM2	1.88009e+16
GOTERM_CC_FAT	GO:0044459~plasma membrane part	3	1.71429e+16	9	2203	12782	0.4130534152080514	0.965383868172216	PTK2, CLTA, DMD	1934029353911330
SP_PIR_KEYWORDS	membrane	3	1.71429e+16	9	6256	19235	0.7913785442781756	0.9993599367884446	PTK2, CLTA, DMD	1024882779198630
GOTERM_BP_FAT	GO:0007010~cytoskeleton organization	3	1.71429e+16	9	436	13528	0.025511602176712903	0.5057925835343452	PTK2, DMD, RAF1	1.03425e+16
UP_SEQ_FEATURE	nucleotide phosphate-binding region:ATP	3	1.71429e+16	9	962	19113	0.05789497796524346	0.8722307042163682	CDC6, PTK2, RAF1	6622661122661120
SP_PIR_KEYWORDS	atp-binding	3	1.71429e+16	9	1326	19235	0.10074676224779508	0.8019838305291541	CDC6, PTK2, RAF1	4835344394167920
SP_PIR_KEYWORDS	nucleotide-binding	3	1.71429e+16	9	1686	19235	0.15096932427489337	0.8642107914908306	CDC6, PTK2, RAF1	3802886516409640
GOTERM_MF_FAT	GO:0005524~ATP binding	3	1.71429e+16	9	1477	12983	0.2286534092323468	0.9736066874397734	CDC6, PTK2, RAF1	2.93004e+16
GOTERM_MF_FAT	GO:0032559~adenyl ribonucleotide binding	3	1.71429e+16	9	1497	12983	0.23341680062977546	0.9490593918486576	CDC6, PTK2, RAF1	2890892896904920
GOTERM_MF_FAT	GO:0030554~adenyl nucleotide binding	3	1.71429e+16	9	1577	12983	0.25260056287288074	0.9339571479195871	CDC6, PTK2, RAF1	2.74424e+16
GOTERM_MF_FAT	GO:0001883~purine nucleoside binding	3	1.71429e+16	9	1601	12983	0.25839070770266204	0.9085041696733632	CDC6, PTK2, RAF1	2.7031e+16
GOTERM_MF_FAT	GO:0001882~nucleoside binding	3	1.71429e+16	9	1612	12983	0.26104914514068334	0.8796880152682289	CDC6, PTK2, RAF1	2.68466e+16
GOTERM_MF_FAT	GO:0032555~purine ribonucleotide binding	3	1.71429e+16	9	1836	12983	0.31559242972501456	0.9055303910026251	CDC6, PTK2, RAF1	2.35712e+16
GOTERM_MF_FAT	GO:0032553~ribonucleotide binding	3	1.71429e+16	9	1836	12983	0.31559242972501456	0.9055303910026251	CDC6, PTK2, RAF1	2.35712e+16
GOTERM_MF_FAT	GO:0017076~purine nucleotide binding	3	1.71429e+16	9	1918	12983	0.33563199706809244	0.8987281451361787	CDC6, PTK2, RAF1	2.25634e+16
GOTERM_MF_FAT	GO:0000166~nucleotide binding	3	1.71429e+16	9	2245	12983	0.4148107680542914	0.9346377865365478	CDC6, PTK2, RAF1	1.92769e+16
SP_PIR_KEYWORDS	polymorphism	4	2.28571e+16	9	11550	19235	0.9505171144482246	0.9999979509431703	CDC6, PTK2, DMD, RAF1	0.7401635401635401
UP_SEQ_FEATURE	sequence variant	4	2.28571e+16	9	11992	19113	0.9651745462524662	1.0	CDC6, PTK2, DMD, RAF1	0.7083611296419835
GOTERM_CC_FAT	GO:0031090~organelle membrane	4	2.28571e+16	9	1096	12782	0.025359032059586388	0.47720945029843276	CLTA, GRB2, RAF1, MDM2	5183292781832920
SP_PIR_KEYWORDS	zinc-finger	3	1.71429e+16	9	1718	19235	0.155698119995029	0.8210518597694331	DMD, RAF1, MDM2	3732052774544040
SP_PIR_KEYWORDS	alternative splicing	6	3428571428571420	9	7488	19235	0.1574865960644256	0.7753765274447827	PTK2, CLTA, GRB2, DMD, RAF1, MDM2	1.71252e+16
UP_SEQ_FEATURE	splice variant	6	3428571428571420	9	7458	19113	0.15883019343908222	0.981279194296002	PTK2, CLTA, GRB2, DMD, RAF1, MDM2	1708500938589430
GOTERM_CC_FAT	GO:0005886~plasma membrane	5	2857142857142850	9	3777	12782	0.18593938539132848	0.8747917028531198	PTK2, CLTA, DMD, RAF1, MDM2	1.88009e+16
SP_PIR_KEYWORDS	zinc	3	1.71429e+16	9	2189	19235	0.22878110853551561	0.8620474755052951	DMD, RAF1, MDM2	2.92904e+16
SP_PIR_KEYWORDS	metal-binding	3	1.71429e+16	9	2972	19235	0.35709647860420046	0.9324400362752092	DMD, RAF1, MDM2	2.15736e+16
GOTERM_MF_FAT	GO:0008270~zinc ion binding	3	1.71429e+16	9	2311	12983	0.43051071514840267	0.927734235786545	DMD, RAF1, MDM2	1.87264e+16
GOTERM_MF_FAT	GO:0046872~metal ion binding	4	2.28571e+16	9	4140	12983	0.4959179479786866	0.9477041945289136	CLTA, DMD, RAF1, MDM2	1393773483628550
GOTERM_MF_FAT	GO:0043169~cation binding	4	2.28571e+16	9	4179	12983	0.5034301625238323	0.9391975128197542	CLTA, DMD, RAF1, MDM2	1.38077e+16
GOTERM_MF_FAT	GO:0043167~ion binding	4	2.28571e+16	9	4241	12983	0.5153180629944563	0.9330569467041671	CLTA, DMD, RAF1, MDM2	1.36058e+16
GOTERM_MF_FAT	GO:0046914~transition metal ion binding	3	1.71429e+16	9	2785	12983	0.5385309616362344	0.9332426654934413	DMD, RAF1, MDM2	1.55392e+16
