# Supplementary material for: Deciphering the effect of an oxovanadium(iv) complex with the flavonoid chrysin (VOChrys) on intracellular cell signalling pathways in an osteosarcoma cell line
Source: Royal Society of Chemistry journal article supplement (doi:10.1039/c6mt00045b), 2016-01-01
Supplement: c6mt00045b11.pdf [file c6mt00045b11.pdf]

## Supporting Information

**Supporting Information S1.** UV–vis spectra of  $[\text{VO}(\text{chrysin})_2\text{EtOH}]_2$  (0.02 M) in DMSO solution (A) and  $[\text{VO}(\text{chrysin})_2\text{EtOH}]_2$  (0.0001 M) in RPMI medium with 0,5% of DMSO (pH= 7.4) (B)

**Supporting Information S2.** List of up- and down-regulated proteins identified in the treatment with 25  $\mu\text{M}$  of  $[\text{VO}(\text{chrysin})_2\text{EtOH}]_2$  during 3 h. The name, subcellular location and Cy5/Cy3 ratio values are given for each protein.

**Supporting Information S3.** List of up- and down-regulated proteins identified in the treatment with 25  $\mu\text{M}$  of  $[\text{VO}(\text{chrysin})_2\text{EtOH}]_2$  during 6 h. The name, subcellular location and Cy5/Cy3 ratio values are given for each protein.

**Supporting Information S4.** List of up- and down-regulated proteins identified in the treatment with 100  $\mu\text{M}$  of  $[\text{VO}(\text{chrysin})_2\text{EtOH}]_2$  during 6 h. The name, subcellular location and Cy5/Cy3 ratio values are given for each protein.

**Supporting Information S5.** Functional annotation of up-regulated proteins identified in the treatment with 25  $\mu\text{M}$  of  $[\text{VO}(\text{chrysin})_2\text{EtOH}]_2$  during 3 h.

**Supporting Information S6.** Functional annotation of down-regulated proteins identified in the treatment with 25  $\mu\text{M}$  of  $[\text{VO}(\text{chrysin})_2\text{EtOH}]_2$  during 6 h.

**Supporting Information S7.** Functional annotation of up-regulated proteins identified in the treatment with 25  $\mu\text{M}$  of  $[\text{VO}(\text{chrysin})_2\text{EtOH}]_2$  during 6 h.

**Supporting Information S8.** Functional annotation of down-regulated proteins identified in the treatment with 100  $\mu\text{M}$  of  $[\text{VO}(\text{chrysin})_2\text{EtOH}]_2$  during 6 h.

**Supporting Information S9.** Functional annotation of up-regulated proteins identified in the treatment with 100  $\mu\text{M}$  of  $[\text{VO}(\text{chrysin})_2\text{EtOH}]_2$  during 6 h.

**Supporting Information S10.** List of vanadium compounds that up- and down-regulated cell signaling pathways identified in the literature.
