# Supplementary figures and images for: Deciphering the effect of an oxovanadium(iv) complex with the flavonoid chrysin (VOChrys) on intracellular cell signalling pathways in an osteosarcoma cell line
Source: Royal Society of Chemistry journal article supplement (doi:10.1039/c6mt00045b), 2016-01-01

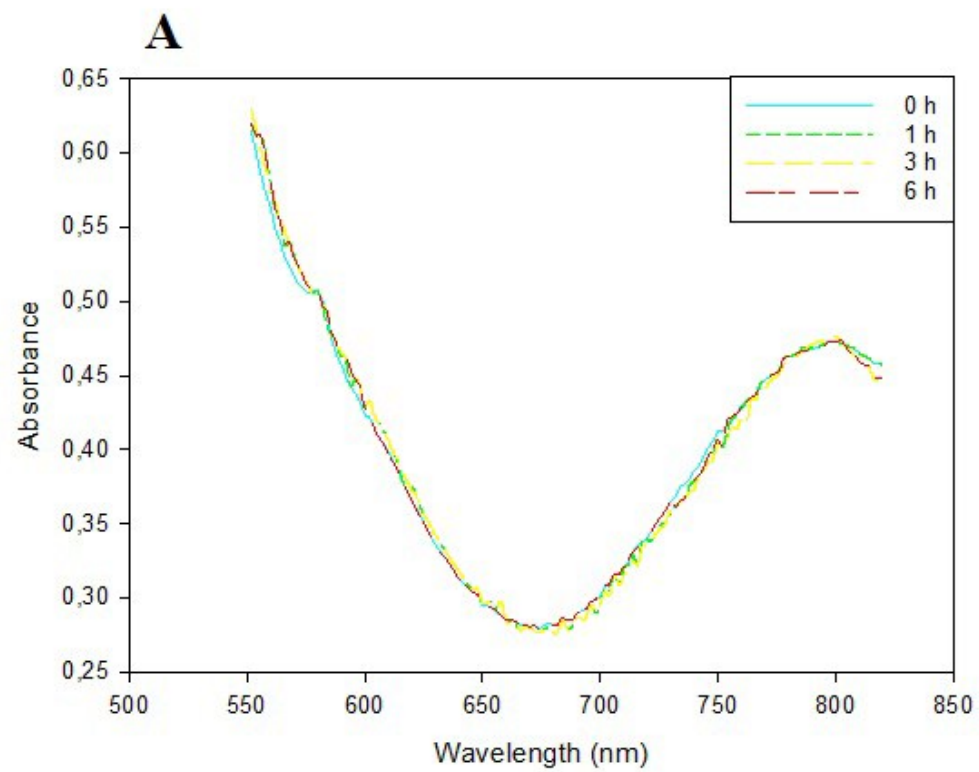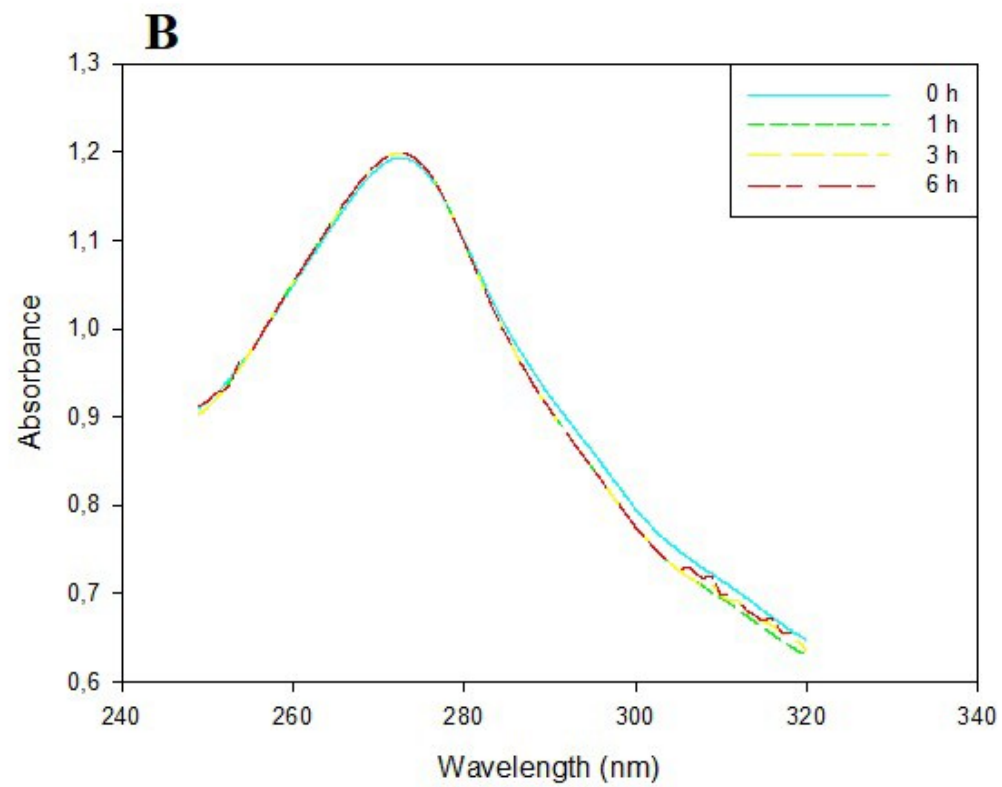

Supplement: c6mt00045b1.pdf [file c6mt00045b1.pdf]
